# Supplementary material for: A theoretical study of methylation and CH/π interactions in DNA intercalation: methylated 1,10-phenanthroline in adenine–thymine base pairs
Source: Royal Society of Chemistry journal article supplement (doi:10.1039/c6ra15495f), 2016-01-01
Supplement: c6ra15495f1.pdf [file c6ra15495f1.pdf]

## Supporting Information for

### **A Theoretical Study of Methylation and CH/ $\pi$ Interactions in DNA Intercalation: Methylated 1,10-Phenanthroline in Adenine-Thymine Base Pairs**

Adrià Gil<sup>\*1</sup>, Vicenç Branchadell<sup>2</sup>, Maria José Calhorda<sup>\*1</sup>

<sup>1</sup>*Centro de Química e Bioquímica, Faculdade de Ciências, Universidade de Lisboa, Campo Grande  
1749-016 Lisboa, Portugal*

<sup>2</sup>*Departament de Química, Universitat Autònoma de Barcelona, 08193 Bellaterra, Barcelona, Spain*

This Supporting Information includes definitions for the  $R$  and  $\theta$  geometrical parameters, the AIM topologies of all the intercalated systems, values of the Energy Decomposition Analysis, values of the energies of frontier molecular orbitals, dipole moment and polarizability of the analyzed systems, values of the electron density ( $\rho$ ) and Laplacian ( $\nabla^2\rho$ ) of all BCPs corresponding to the studied weak interactions found in all the studied systems, and Cartesian coordinates of all the optimized structures.

# Contents

## Figures

Figure S1. Topologies of the (AT/4-Mephen/TA)mg, (AT/5-phen/TA)mg, (AT/4,7-Me<sub>2</sub>phen/TA)mg, (AT/5,6-Me<sub>2</sub>phen/TA)mg, (AT/3,4,7,8-Me<sub>4</sub>phen/TA)mg, and (AT/phen/TA)mg systems. Small red spheres correspond to BCPs, yellow spheres to RCPs, and green spheres to CCP. BPs connecting atoms are also shown.

Figure S2. Topologies of the (AT/4-Mephen/TA)MG, (AT/5-phen/TA)MG, (AT/4,7-Me<sub>2</sub>phen/TA)MG, (AT/5,6-Me<sub>2</sub>phen/TA)MG, (AT/3,4,7,8-Me<sub>4</sub>phen/TA)MG, and (AT/phen/TA)MG systems. Small red spheres correspond to BCPs, yellow spheres to RCPs, and green spheres to CCP. BPs connecting atoms are also shown.

## Tables

Table S1. Decomposition of the Interaction Energy (kcal mol<sup>-1</sup>) between the intercalator<sup>a</sup> and the two pairs of bases (AT/TA) at M06-2X/TZP and B3LYP-D3/TZP levels of calculation when intercalation takes place from the Minor Groove (mg).

Table S2. Decomposition of the Interaction Energy (kcal mol<sup>-1</sup>) between the intercalator<sup>a</sup> and the two pairs of bases (AT/TA) at M06-2X/TZP and B3LYP-D3/TZP levels of calculation when intercalation takes place from the Major Groove (MG).

Table S3. Energies (eV) of frontier molecular orbitals, dipole moment,  $\mu$ , (in D) and polarizability,  $\alpha$ , (in a. u.<sup>-3</sup>), of the analyzed systems at M06-2X/6-31+G(d,p) level of calculation.

Table S4. Electron Density ( $\rho$ ) and Laplacian ( $\nabla^2\rho$ ) in a.u. on all BCPs corresponding to weak interactions found in (AT/4-Mephen/TA)mg system.

Table S5. Electron Density ( $\rho$ ) and Laplacian ( $\nabla^2\rho$ ) in a.u. on all BCPs corresponding to weak interactions found in (AT/5-Mephen/TA)mg system.

Table S6. Electron Density ( $\rho$ ) and Laplacian ( $\nabla^2\rho$ ) in a.u. on all BCPs corresponding to weak interactions found in (AT/4,7-Me<sub>2</sub>phen/TA)mg system.

Table S7. Electron Density ( $\rho$ ) and Laplacian ( $\nabla^2\rho$ ) in a.u. on all BCPs corresponding to weak interactions found in (AT/5,6-Me<sub>2</sub>phen/TA)mg system.

Table S8. Electron Density ( $\rho$ ) and Laplacian ( $\nabla^2\rho$ ) in a.u. on all BCPs corresponding to weak interactions found in (AT/3,4,7,8-Me<sub>4</sub>phen/TA)mg system.

Table S9. Electron Density ( $\rho$ ) and Laplacian ( $\nabla^2\rho$ ) in a.u. on all BCPs corresponding to weak interactions found in (AT/4phen/TA)mg system.

Table S10. Electron Density ( $\rho$ ) and Laplacian ( $\nabla^2\rho$ ) in a.u. on all BCPs corresponding to weak interactions found in (AT/4-Mephen/TA)MG system.

Table S11. Electron Density ( $\rho$ ) and Laplacian ( $\nabla^2\rho$ ) in a.u. on all BCPs corresponding to weak interactions found in (AT/5-Mephen/TA)MG system.

Table S12. Electron Density ( $\rho$ ) and Laplacian ( $\nabla^2\rho$ ) in a.u. on all BCPs corresponding to weak interactions found in (AT/4,7-Me<sub>2</sub>phen/TA)MG system.

Table S13. Electron Density ( $\rho$ ) and Laplacian ( $\nabla^2\rho$ ) in a.u. on all BCPs corresponding to weak interactions found in (AT/5,6-Me<sub>2</sub>phen/TA)MG system.

Table S14. Electron Density ( $\rho$ ) and Laplacian ( $\nabla^2\rho$ ) in a.u. on all BCPs corresponding to weak interactions found in (AT/3,4,7,8-Me<sub>4</sub>phen/TA)MG system.

Table S15. Electron Density ( $\rho$ ) and Laplacian ( $\nabla^2\rho$ ) in a.u. on all BCPs corresponding to weak interactions found in (AT/4phen/TA)MG system.

Table S16. Cartesian coordinates of: phen (M06-2X/6-31+G(d,p)), 4-Mephen (M06-2X/6-31+G(d,p)), 5-Mephen (M06-2X/6-31+G(d,p)), 4,7-Me<sub>2</sub>phen (M06-2X/6-31+G(d,p)), 5,6-Me<sub>2</sub>phen (M06-2X/6-31+G(d,p)), 3,4,7,8-Me<sub>4</sub>phen (M06-2X/6-31+G(d,p)), AT/TA (M06-2X/6-31+G(d,p)), (AT/phen/TA)mg (M06-2X/6-31+G(d,p)), (AT/4-Mephen/TA)mg (M06-2X/6-31+G(d,p)), (AT/5-Mephen/TA)mg (M06-2X/6-31+G(d,p)), (AT/4,7-Me<sub>2</sub>phen/TA)mg (M06-2X/6-31+G(d,p)), (AT/5,6-Me<sub>2</sub>phen/TA)mg (M06-2X/6-31+G(d,p)), (AT/3,4,7,8-Me<sub>4</sub>phen/TA)mg (M06-2X/6-31+G(d,p)), (AT/phen/TA)MG (M06-2X/6-31+G(d,p)), (AT/4-Mephen/TA)MG (M06-2X/6-31+G(d,p)), (AT/5-Mephen/TA)MG (M06-2X/6-31+G(d,p)), (AT/4,7-Me<sub>2</sub>phen/TA)MG (M06-2X/6-31+G(d,p)), (AT/5,6-Me<sub>2</sub>phen/TA)MG (M06-2X/6-31+G(d,p)), (AT/3,4,7,8-Me<sub>4</sub>phen/TA)MG (M06-2X/6-31+G(d,p)).

### **Definitions for the $R$ and $q$ parameters.**

We defined the  $xy$  plane by the two atoms forming the  $N_6 \cdots N_7$  hydrogen bond and the third atom for the definition of the  $xy$  plane is the  $C_8$  atom of adenine (see Fig. 1). Then, we define the  $R$  mean distance between the two base pairs as the difference between the mean  $z$  value of the atoms of the upper base pair and the one of the atoms of the lower base pair. The mean distance between phen and base pairs is calculated similarly. We also analyzed the  $\theta$  angle, defined in Fig. 1. The dashed line joining the  $C_2$  atom of the purine base (adenine) to the  $C_2$  atom of the pyrimidine (thymine) is the long base-pair axis and the  $\theta$  angle is defined as the rotation of one base pair around the center of its  $C_2-C_2$  axis. Because the base pairs are not strictly planar and parallel after optimization, the  $\theta$  angle of the optimized systems is defined as the  $\theta$  angle between the projections on the  $xy$  plane of the  $C_2-C_2$  axis of each base pair.

## Figures

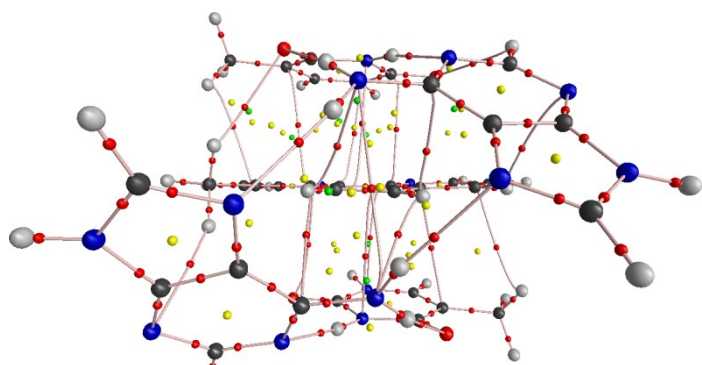

**(AT/4-Mephen/TA)mg**

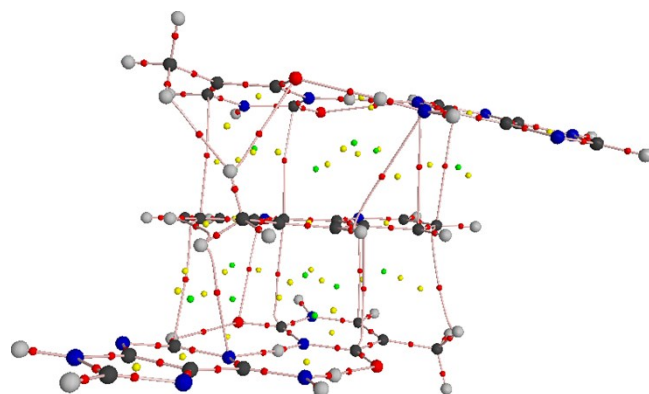

**(AT/5-Mephen/TA)mg**

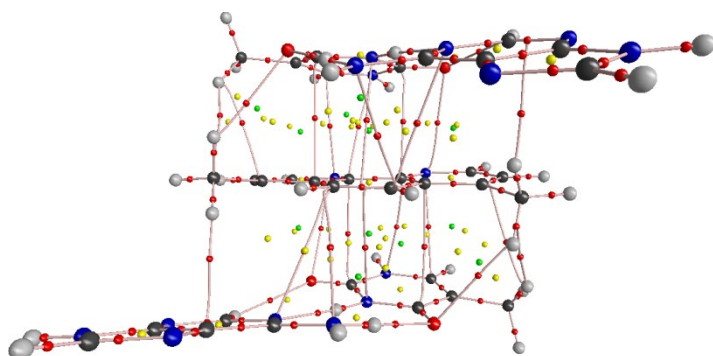

**(AT/4,7-Me<sub>2</sub>phen/TA)mg**

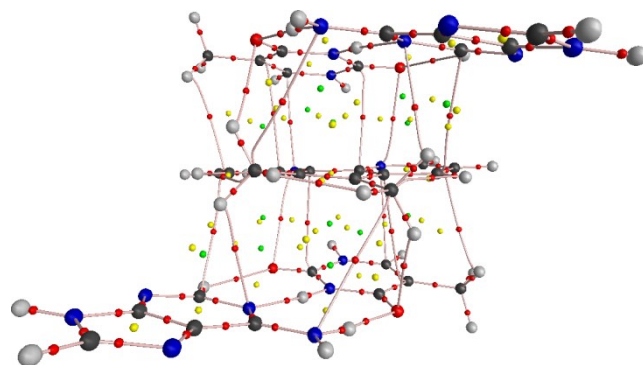

**(AT/5,6-Me<sub>2</sub>phen/TA)mg**

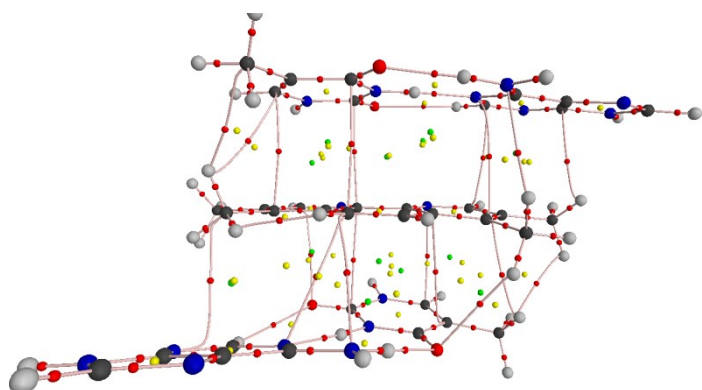

**(AT/3,4,7,8-Me<sub>4</sub>phen/TA)mg**

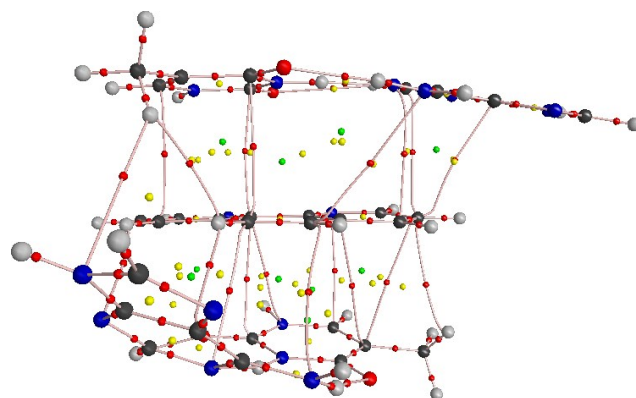

**(AT/phen/TA)mg**

**Figure S1.** Topologies of the (AT/4-Mephen/TA)mg, (AT/5-phen/TA)mg, (AT/4,7-Me<sub>2</sub>phen/TA)mg, (AT/5,6-Me<sub>2</sub>phen/TA)mg, (AT/3,4,7,8-Me<sub>4</sub>phen/TA)mg, and (AT/phen/TA)mg systems. Small red spheres correspond to BCPs, yellow spheres to RCPs, and green spheres to CCP. BPs connecting atoms are also shown.

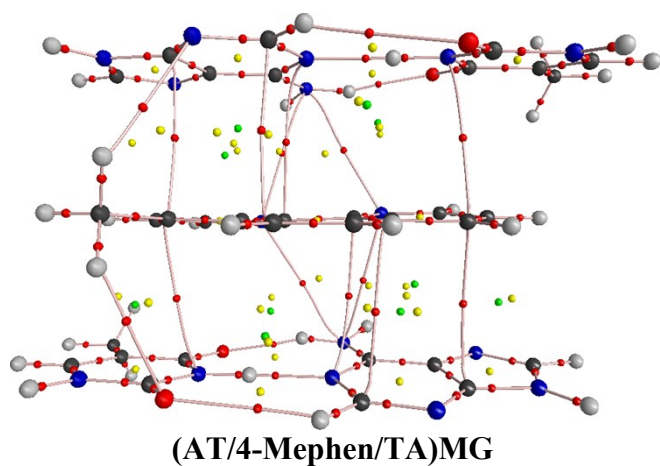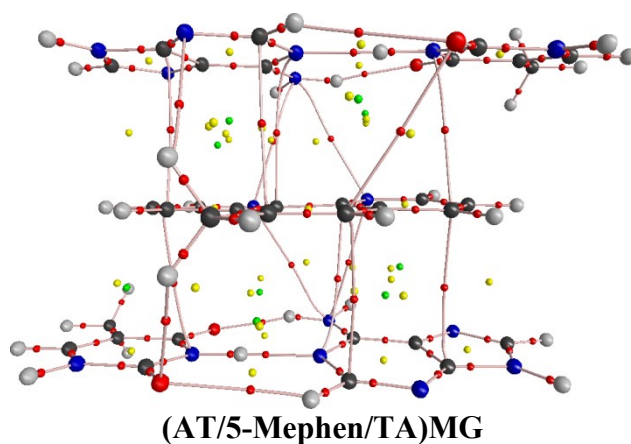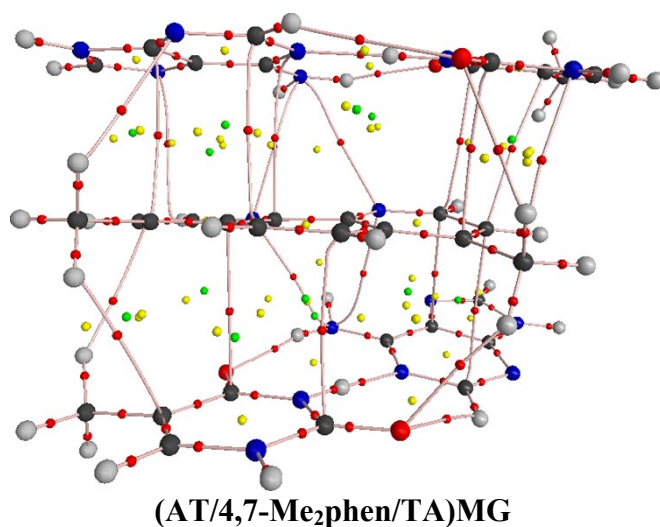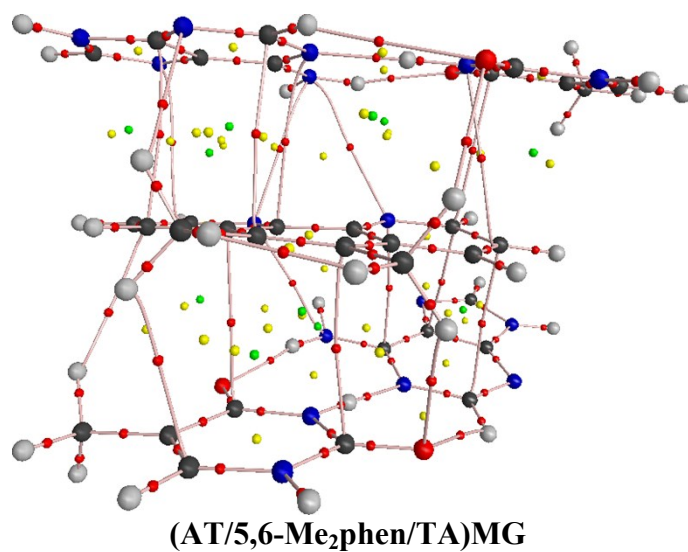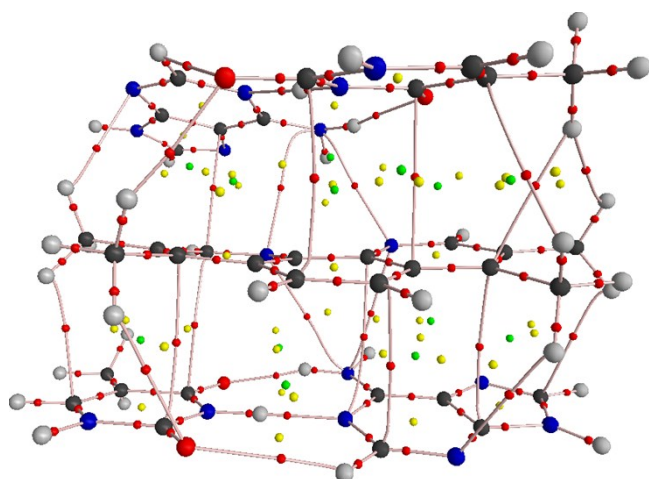

(AT/3,4,7,8-Me<sub>4</sub>phen/TA)MG

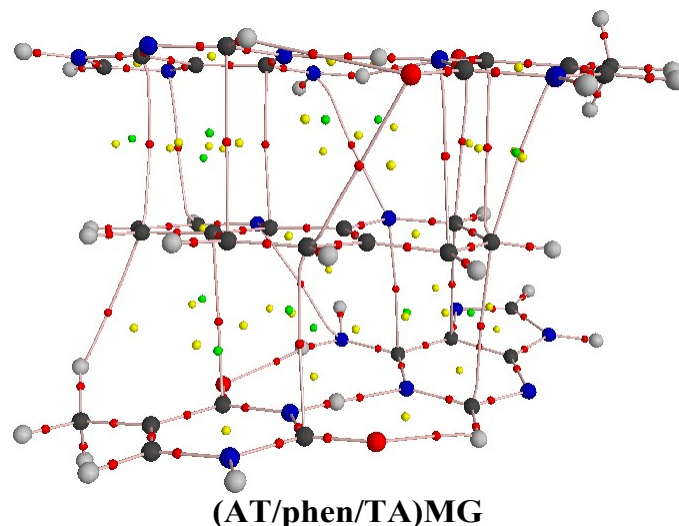

**Figure S2.** Topologies of the (AT/4-Mephen/TA)MG, (AT/5-phen/TA)MG, (AT/4,7-Me<sub>2</sub>phen/TA)MG, (AT/5,6-Me<sub>2</sub>phen/TA)MG, (AT/3,4,7,8-Me<sub>4</sub>phen/TA)MG, and (AT/phen/TA)MG systems. Small red spheres correspond to BCPs, yellow spheres to RCPs, and green spheres to CCP. BPs connecting atoms are also shown.

### Energy Decomposition Analysis (EDA).

Table S1 and Table S2 give the values of the EDA for (AT/intercalator/TA)mg and (AT/intercalator/TA)MG systems, respectively, with intercalators phen, 4-Mephen, 5-Mephen, 4,7-Me<sub>2</sub>phen, 5,6-Me<sub>2</sub>phen and 3,4,7,8-Me<sub>4</sub>phen. For all the studied systems  $\Delta E_{orb}$  terms are comparable for both functionals, M06-2X and B3LYP-D3, and the  $\Delta E_{elstat}$  contribution is also very similar when comparing the results of the two functionals. On the other hand, as expected, the  $\Delta E_{Pauli}$  term is larger in the B3LYP-D3 functional with the explicit term for dispersion, but is in most cases nearly compensated by the  $R^{-6}$  term after adding the  $\Delta E_{Pauli}$  and  $\Delta E_{disp}$  terms with opposite sign (see Table S1 and Table S2).



**Table S1.** Decomposition of the Interaction Energy (kcal mol<sup>-1</sup>) between the intercalator<sup>a</sup> and the two pairs of bases (AT/TA) at M06-2X/TZP and B3LYP-D3/TZP levels of calculation when intercalation takes place from the Minor Groove (mg).

| <b>Intercalator</b> | <b>Contribution</b> | <b>M06-2X</b> | <b>B3LYP-D3</b> |
|---------------------|---------------------|---------------|-----------------|
| Phen                | $\Delta E_{Pauli}$  | 18.2          | 55.3            |
|                     | $\Delta E_{elstat}$ | -24.4         | -25.8           |
|                     | $\Delta E_{orb}$    | -13.7         | -12.4           |
|                     | $\Delta E_{disp}$   |               | -46.3           |
|                     | $\Delta E_{int}$    | -19.9         | -29.2           |
| 4-Mephen            | $\Delta E_{Pauli}$  | 21.9          | 60.3            |
|                     | $\Delta E_{elstat}$ | -30.0         | -31.2           |
|                     | $\Delta E_{orb}$    | -19.1         | -14.6           |
|                     | $\Delta E_{disp}$   |               | -48.6           |
|                     | $\Delta E_{int}$    | -27.3         | -34.1           |
| 5-Mephen            | $\Delta E_{Pauli}$  | 13.4          | 56.8            |
|                     | $\Delta E_{elstat}$ | -24.3         | -25.9           |
|                     | $\Delta E_{orb}$    | -20.2         | -13.1           |
|                     |                     |               | -48.3           |

|                              |                     |       |       |
|------------------------------|---------------------|-------|-------|
|                              | $\Delta E_{disp}$   | -31.2 | -30.5 |
|                              | $\Delta E_{int}$    |       |       |
| 4,7-Me <sub>2</sub> phen     | $\Delta E_{Pauli}$  | 15.7  | 62.9  |
|                              | $\Delta E_{elstat}$ | -31.4 | -33.0 |
|                              | $\Delta E_{orb}$    | -18.9 | -15.3 |
|                              | $\Delta E_{disp}$   |       | -51.1 |
|                              | $\Delta E_{int}$    | -34.6 | -36.5 |
| 5,6-Me <sub>2</sub> phen     | $\Delta E_{Pauli}$  | 15.7  | 62.8  |
|                              | $\Delta E_{elstat}$ | -32.0 | -33.2 |
|                              | $\Delta E_{orb}$    | -19.7 | -15.5 |
|                              | $\Delta E_{disp}$   |       | -51.8 |
|                              | $\Delta E_{int}$    | -35.9 | -37.7 |
| 3,4,7,8-Me <sub>4</sub> phen | $\Delta E_{Pauli}$  | 20.0  | 63.5  |
|                              | $\Delta E_{elstat}$ | -26.9 | -28.0 |
|                              | $\Delta E_{orb}$    | -19.4 | -14.9 |
|                              | $\Delta E_{disp}$   |       | -55.6 |
|                              | $\Delta E_{int}$    | -26.4 | -35.0 |

<sup>a</sup> Intercalator can be: phen, 4-Mephen, 5-Mephen, 4,7-Me<sub>2</sub>phen, 5,6-Me<sub>2</sub>phen and 3,4,7,8-Me<sub>4</sub>phen.

**Table S2.** Decomposition of the Interaction Energy (kcal mol<sup>-1</sup>) between the intercalator<sup>a</sup> and the two pairs of bases (AT/TA) at M06-2X/TZP and B3LYP-D3/TZP levels of calculation when intercalation takes place from the Major Groove (MG).

| <b>Intercalator</b> | <b>Contribution</b> | <b>M06-2X</b> | <b>B3LYP-D3</b> |
|---------------------|---------------------|---------------|-----------------|
| Phen                | $\Delta E_{Pauli}$  | 19.4          | 60.5            |
|                     | $\Delta E_{elstat}$ | -27.2         | -29.0           |
|                     | $\Delta E_{orb}$    | -16.2         | -12.6           |
|                     | $\Delta E_{disp}$   |               | -49.4           |
|                     | $\Delta E_{int}$    | -24.0         | -30.4           |
| 4-Mephen            | $\Delta E_{Pauli}$  | 19.9          | 62.6            |
|                     | $\Delta E_{elstat}$ | -27.5         | -29.5           |
|                     | $\Delta E_{orb}$    | -17.4         | -13.4           |
|                     | $\Delta E_{disp}$   |               | -52.4           |
|                     | $\Delta E_{int}$    | -25.0         | -32.6           |
| 5-Mephen            | $\Delta E_{Pauli}$  | 20.0          | 61.1            |
|                     | $\Delta E_{elstat}$ | -27.5         | -29.5           |
|                     | $\Delta E_{orb}$    | -16.7         | -12.8           |
|                     | $\Delta E_{disp}$   |               | -51.2           |
|                     | $\Delta E_{int}$    | -24.3         | -32.4           |

|                              |                     |       |       |
|------------------------------|---------------------|-------|-------|
| 4,7-Me <sub>2</sub> phen     | $\Delta E_{Pauli}$  | 23.0  | 68.3  |
|                              | $\Delta E_{elstat}$ | -31.8 | -33.7 |
|                              | $\Delta E_{orb}$    | -19.3 | -15.0 |
|                              | $\Delta E_{disp}$   |       | -51.1 |
|                              | $\Delta E_{int}$    | -28.1 | -35.5 |
| 5,6-Me <sub>2</sub> phen     | $\Delta E_{Pauli}$  | 23.1  | 67.0  |
|                              | $\Delta E_{elstat}$ | -31.4 | -33.3 |
|                              | $\Delta E_{orb}$    | -19.0 | -14.8 |
|                              | $\Delta E_{disp}$   |       | -53.7 |
|                              | $\Delta E_{int}$    | -27.2 | -34.8 |
| 3,4,7,8-Me <sub>4</sub> phen | $\Delta E_{Pauli}$  | 25.3  | 74.3  |
|                              | $\Delta E_{elstat}$ | -34.2 | -36.1 |
|                              | $\Delta E_{orb}$    | -21.6 | -17.0 |
|                              | $\Delta E_{disp}$   |       | -60.1 |
|                              | $\Delta E_{int}$    | -30.4 | -38.9 |

<sup>a</sup> Intercalator can be: phen, 4-Mephen, 5-Mephen, 4,7-Me<sub>2</sub>phen, 5,6-Me<sub>2</sub>phen and 3,4,7,8-Me<sub>4</sub>phen.

**Table S3.** Energies (eV) of frontier molecular orbitals, dipole moment,  $\mu$ , (in D) and polarizability,  $\alpha$ , (in a. u.<sup>-3</sup>), of the analyzed systems at M06-2X/6-31+G(d,p) level of calculation.

| <b>System</b>                          | <b>HOMO</b> | <b>LUMO</b> | <b><math>\mu</math></b> | <b><math>\alpha</math></b> |
|----------------------------------------|-------------|-------------|-------------------------|----------------------------|
| Phen                                   | -7.76       | -0.85       | 3.3                     | 152.7                      |
| 4-Mephen                               | -7.66       | -0.86       | 3.7                     | 165.8                      |
| 5-Mephen                               | -7.61       | -0.81       | 3.7                     | 165.8                      |
| 4,7-Me <sub>2</sub> phen               | -7.57       | -0.87       | 4.1                     | 179.0                      |
| 5,6-Me <sub>2</sub> phen               | -7.50       | -0.74       | 4.0                     | 177.8                      |
| 3,4,7,8-Me <sub>4</sub> phen           | -7.45       | -0.79       | 3.9                     | 207.9                      |
| AT                                     | -7.46       | -0.30       | 1.5                     | 170.3                      |
| AT/TA                                  | -7.49       | -0.21       | 0.6                     | 332.9                      |
| (AT/phen/TA)mg                         | -7.42       | -0.92       | 2.3                     | 461.9                      |
| (AT/4-Mephen/TA)mg                     | -7.41       | -0.79       | 0.8                     | 472.1                      |
| (AT/5-Mephen/TA)mg                     | -7.26       | -0.76       | 2.3                     | 477.3                      |
| (AT/4,7-Me <sub>2</sub> phen/TA)mg     | -7.32       | -0.71       | 2.4                     | 488.5                      |
| (AT/5,6-Me <sub>2</sub> phen/TA)mg     | -7.27       | -0.76       | 2.1                     | 485.5                      |
| (AT/3,4,7,8-Me <sub>4</sub> phen/TA)mg | -7.16       | -0.78       | 2.7                     | 515.3                      |
| (AT/phen/TA)MG                         | -7.07       | -0.66       | 3.8                     | 460.7                      |
| (AT/4-Mephen/TA)MG                     | -6.98       | -0.59       | 2.7                     | 470.4                      |

|                                        |       |       |     |       |
|----------------------------------------|-------|-------|-----|-------|
| (AT/5-Mephen/TA)MG                     | -6.94 | -0.61 | 2.6 | 471.5 |
| (AT/4,7-Me <sub>2</sub> phen/TA)MG     | -7.00 | -0.64 | 4.0 | 483.5 |
| (AT/5,6-Me <sub>2</sub> phen/TA)MG     | -7.00 | -0.60 | 4.1 | 483.2 |
| (AT/3,4,7,8-Me <sub>4</sub> phen/TA)MG | -6.97 | -0.63 | 4.1 | 508.9 |

**Table S4.** Electron Density ( $\rho$ ) and Laplacian ( $\nabla^2\rho$ ) in a.u. on all BCPs corresponding to weak interactions found in (AT/4-Mephen/TA)mg system.

| BCP's                                                               | $\rho$ | $\nabla^2\rho$ |
|---------------------------------------------------------------------|--------|----------------|
| N <sub>6</sub> -H $\cdots$ O <sub>5</sub> (u)                       | 0.0209 | 0.0633         |
| N <sub>6</sub> -H $\cdots$ O <sub>5</sub> (d)                       | 0.0222 | 0.0682         |
| N <sub>7</sub> $\cdots$ H-N <sub>6</sub> (u)                        | 0.0386 | 0.0970         |
| N <sub>7</sub> $\cdots$ H-N <sub>6</sub> (d)                        | 0.0301 | 0.0799         |
| C <sub>8</sub> -H $\cdots$ O <sub>8</sub> (u)                       | 0.0055 | 0.0206         |
| C <sub>8</sub> -H $\cdots$ O <sub>8</sub> (d)                       | No BCP | No BCP         |
| N <sub>6</sub> (u)-H $\cdots$ N <sub>3</sub> (d)                    | 0.0171 | 0.0506         |
| N <sub>6</sub> (d)-H $\cdots$ N <sub>3</sub> (u)                    | 0.0179 | 0.0536         |
| C <sub>3</sub> (Tu) $\cdots$ C <sub>13</sub> (phen)                 | 0.0076 | 0.0198         |
| N <sub>1</sub> (Tu) $\cdots$ C <sub>12</sub> (phen)                 | 0.0080 | 0.0242         |
| N <sub>6</sub> (Tu) $\cdots$ C <sub>5</sub> (phen)                  | 0.0070 | 0.0183         |
| C <sub>7</sub> (Tu) $\cdots$ C <sub>11</sub> (phen)                 | 0.0081 | 0.0303         |
| C <sub>5</sub> (Au) $\cdots$ H <sub>6</sub> (phen)                  | 0.0100 | 0.0377         |
| N <sub>9</sub> (Au) $\cdots$ H <sub>7</sub> (phen)                  | 0.0058 | 0.0182         |
| N <sub>6</sub> (Au) $\cdots$ H <sub>5</sub> (phen)                  | 0.0070 | 0.0208         |
| C <sub>5</sub> (Ad) $\cdots$ H <sub>5</sub> (phen)                  | 0.0082 | 0.0310         |
| N <sub>6</sub> (Ad) $\cdots$ H <sub>6</sub> (phen)                  | 0.0086 | 0.0268         |
| O <sub>8</sub> (Td) $\cdots$ C <sub>13</sub> (phen)                 | 0.0076 | 0.0241         |
| N <sub>6</sub> (Td) $\cdots$ C <sub>6</sub> (phen)                  | 0.0076 | 0.0191         |
| N <sub>1</sub> (Td) $\cdots$ C <sub>11</sub> (phen)                 | 0.0084 | 0.0249         |
| C <sub>3</sub> (Td) $\cdots$ C <sub>14</sub> (phen)                 | 0.0076 | 0.0189         |
| N <sub>6</sub> (Au) $\cdots$ N <sub>6</sub> (Ad)                    | 0.0032 | 0.0096         |
| C <sub>3</sub> -CH <sub>3</sub> (Tu) $\cdots$ C <sub>4</sub> (phen) | 0.0069 | 0.0222         |
| C <sub>4</sub> -CH <sub>3</sub> (phen) $\cdots$ O <sub>5</sub> (Tu) | 0.0072 | 0.0248         |
| C <sub>4</sub> -CH <sub>3</sub> (phen) $\cdots$ N <sub>9</sub> (Ad) | 0.0093 | 0.0302         |
| C <sub>3</sub> -CH <sub>3</sub> (Td) $\cdots$ C <sub>7</sub> (phen) | 0.0062 | 0.0195         |

**Table S5.** Electron Density ( $\rho$ ) and Laplacian ( $\nabla^2\rho$ ) in a.u. on all BCPs corresponding to weak interactions found in (AT/5-Mephen/TA)mg system.

| BCP's                                                                         | $\rho$ | $\nabla^2\rho$ |
|-------------------------------------------------------------------------------|--------|----------------|
| N <sub>6</sub> -H···O <sub>5</sub> (u)                                        | 0.0241 | 0.0733         |
| N <sub>6</sub> -H···O <sub>5</sub> (d)                                        | 0.0262 | 0.0814         |
| N <sub>7</sub> ···H-N <sub>6</sub> (u)                                        | 0.0492 | 0.1104         |
| N <sub>7</sub> ···H-N <sub>6</sub> (d)                                        | 0.0481 | 0.1105         |
| C <sub>8</sub> -H···O <sub>8</sub> (u)                                        | 0.0066 | 0.0242         |
| C <sub>8</sub> -H···O <sub>8</sub> (d)                                        | 0.0073 | 0.0262         |
| C <sub>2</sub> (Tu)···C <sub>4</sub> (phen)                                   | 0.0072 | 0.0198         |
| C <sub>7</sub> (Tu)···C <sub>12</sub> (phen)                                  | 0.0071 | 0.0261         |
| N <sub>7</sub> (Au)···C <sub>7</sub> (phen)                                   | 0.0079 | 0.0224         |
| N <sub>9</sub> (Au)···C <sub>8</sub> (phen)                                   | 0.0072 | 0.0211         |
| N <sub>6</sub> (Au)···H <sub>6</sub> (phen)                                   | 0.0054 | 0.0152         |
| C <sub>8</sub> (Ad)···C <sub>4</sub> (phen)                                   | 0.0045 | 0.0136         |
| O <sub>8</sub> (Td)···N <sub>1</sub> (phen)                                   | 0.0084 | 0.0277         |
| C <sub>7</sub> (Td)···C <sub>12</sub> (phen)                                  | 0.0088 | 0.0345         |
| C <sub>2</sub> (Td)···N <sub>10</sub> (phen)                                  | 0.0088 | 0.0282         |
| C <sub>4</sub> (Td)···C <sub>14</sub> (phen)                                  | 0.0066 | 0.0194         |
| C <sub>3</sub> -CH <sub>3</sub> (Tu)···H <sub>3</sub> C-C <sub>5</sub> (phen) | 0.0080 | 0.0282         |
| C <sub>5</sub> -CH <sub>3</sub> (phen)···O <sub>5</sub> (Tu)                  | 0.0083 | 0.0286         |
| C <sub>5</sub> -CH <sub>3</sub> (phen)···H <sub>4</sub> (phen)                | 0.0115 | 0.0494         |
| C <sub>5</sub> -CH <sub>3</sub> (phen)···N <sub>7</sub> (Ad)                  | 0.0084 | 0.0291         |
| C <sub>3</sub> -CH <sub>3</sub> (Td)···C <sub>8</sub> (phen)                  | 0.0064 | 0.0199         |

**Table S6.** Electron Density ( $\rho$ ) and Laplacian ( $\nabla^2\rho$ ) in a.u. on all BCPs corresponding to weak interactions found in (AT/4,7-Me<sub>2</sub>phen/TA)mg system.

| BCP's                                                                         | $\rho$ | $\nabla^2\rho$ |
|-------------------------------------------------------------------------------|--------|----------------|
| N <sub>6</sub> -H···O <sub>5</sub> (u)                                        | 0.0231 | 0.0692         |
| N <sub>6</sub> -H···O <sub>5</sub> (d)                                        | 0.0231 | 0.0692         |
| N <sub>7</sub> ···H-N <sub>6</sub> (u)                                        | 0.0477 | 0.1099         |
| N <sub>7</sub> ···H-N <sub>6</sub> (d)                                        | 0.0477 | 0.1099         |
| C <sub>8</sub> -H···O <sub>8</sub> (u)                                        | 0.0068 | 0.0249         |
| C <sub>8</sub> -H···O <sub>8</sub> (d)                                        | 0.0068 | 0.0250         |
| C <sub>2</sub> (Tu)···N <sub>1</sub> (phen)                                   | 0.0081 | 0.0257         |
| C <sub>4</sub> (Tu)···C <sub>13</sub> (phen)                                  | 0.0075 | 0.0239         |
| N <sub>1</sub> (Tu)···C <sub>12</sub> (phen)                                  | 0.0078 | 0.0245         |
| C <sub>7</sub> (Tu)···C <sub>11</sub> (phen)                                  | 0.0087 | 0.0339         |
| N <sub>6</sub> (Tu)···C <sub>5</sub> (phen)                                   | 0.0060 | 0.0160         |
| O <sub>8</sub> (Tu)···N <sub>10</sub> (phen)                                  | 0.0080 | 0.0262         |
| N <sub>7</sub> (Au)···C <sub>6</sub> (phen)                                   | 0.0062 | 0.0174         |
| N <sub>5</sub> (Au)···C <sub>6</sub> (phen)                                   | 0.0058 | 0.0171         |
| N <sub>7</sub> (Ad)···C <sub>5</sub> (phen)                                   | 0.0062 | 0.0174         |
| N <sub>6</sub> (Ad)···C <sub>5</sub> (phen)                                   | 0.0057 | 0.0169         |
| O <sub>8</sub> (Td)···N <sub>1</sub> (phen)                                   | 0.0079 | 0.0260         |
| C <sub>7</sub> (Td)···C <sub>12</sub> (phen)                                  | 0.0087 | 0.0337         |
| N <sub>6</sub> (Td)···C <sub>6</sub> (phen)                                   | 0.0060 | 0.0160         |
| N <sub>1</sub> (Td)···C <sub>11</sub> (phen)                                  | 0.0078 | 0.0245         |
| C <sub>2</sub> (Td)···N <sub>10</sub> (phen)                                  | 0.0081 | 0.0257         |
| C <sub>4</sub> (Td)···C <sub>14</sub> (phen)                                  | 0.0075 | 0.0240         |
| C <sub>5</sub> -CH <sub>3</sub> (Tu)···C <sub>4</sub> (phen)                  | 0.0069 | 0.0221         |
| C <sub>3</sub> -CH <sub>3</sub> (Tu)···CH <sub>3</sub> -C <sub>4</sub> (phen) | 0.0065 | 0.0244         |
| C <sub>4</sub> -CH <sub>3</sub> (phen)···O <sub>5</sub> (Tu)                  | 0.0072 | 0.0247         |
| C <sub>4</sub> -CH <sub>3</sub> (phen)···N <sub>9</sub> (Ad)                  | 0.0086 | 0.0310         |



|                                                                               |        |        |
|-------------------------------------------------------------------------------|--------|--------|
| C <sub>7</sub> -CH <sub>3</sub> (phen)···N <sub>9</sub> (Au)                  | 0.0086 | 0.0312 |
| C <sub>7</sub> -CH <sub>3</sub> (phen)···O <sub>5</sub> (Td)                  | 0.0072 | 0.0248 |
| C <sub>3</sub> -CH <sub>3</sub> (Td)···CH <sub>3</sub> -C <sub>7</sub> (phen) | 0.0065 | 0.0246 |
| C <sub>3</sub> -CH <sub>3</sub> (Td)···C <sub>7</sub> (phen)                  | 0.0070 | 0.0224 |

**Table S7.** Electron Density ( $\rho$ ) and Laplacian ( $\nabla^2\rho$ ) in a.u. on all BCPs corresponding to weak interactions found in (AT/5,6-Me<sub>2</sub>phen/TA)mg system.

| BCP's                                                        | $\rho$ | $\nabla^2\rho$ |
|--------------------------------------------------------------|--------|----------------|
| N <sub>6</sub> -H···O <sub>5</sub> (u)                       | 0.0256 | 0.0789         |
| N <sub>6</sub> -H···O <sub>5</sub> (d)                       | 0.0256 | 0.0789         |
| N <sub>7</sub> ···H-N <sub>6</sub> (u)                       | 0.0485 | 0.1104         |
| N <sub>7</sub> ···H-N <sub>6</sub> (d)                       | 0.0483 | 0.1102         |
| C <sub>8</sub> -H···O <sub>8</sub> (u)                       | 0.0076 | 0.0270         |
| C <sub>8</sub> -H···O <sub>8</sub> (d)                       | 0.0076 | 0.0269         |
| C <sub>2</sub> (Tu)···N <sub>1</sub> (phen)                  | 0.0084 | 0.0272         |
| C <sub>3</sub> (Tu)···C <sub>13</sub> (phen)                 | 0.0069 | 0.0181         |
| C <sub>4</sub> (Tu)···C <sub>11</sub> (phen)                 | 0.0087 | 0.0340         |
| O <sub>5</sub> (Tu)···N <sub>10</sub> (phen)                 | 0.0085 | 0.0279         |
| C <sub>8</sub> (Au)···C <sub>7</sub> (phen)                  | 0.0049 | 0.0148         |
| N <sub>6</sub> (Au)···CH <sub>3</sub> -C <sub>5</sub> (phen) | 0.0052 | 0.0158         |
| C <sub>8</sub> (Ad)···C <sub>4</sub> (phen)                  | 0.0048 | 0.0144         |
| N <sub>6</sub> (Ad)···CH <sub>3</sub> -C <sub>6</sub> (phen) | 0.0053 | 0.0160         |
| O <sub>8</sub> (Td)···N <sub>1</sub> (phen)                  | 0.0085 | 0.0279         |
| C <sub>7</sub> (Td)···C <sub>12</sub> (phen)                 | 0.0088 | 0.0341         |
| C <sub>2</sub> (Td)···N <sub>10</sub> (phen)                 | 0.0084 | 0.0272         |
| C <sub>3</sub> (Td)···C <sub>14</sub> (phen)                 | 0.0069 | 0.0181         |
| C <sub>3</sub> -CH <sub>3</sub> (Tu)···C <sub>4</sub> (phen) | 0.0063 | 0.0194         |
| C <sub>5</sub> -CH <sub>3</sub> (phen)···O <sub>5</sub> (Tu) | 0.0092 | 0.0316         |
| C <sub>5</sub> -CH <sub>3</sub> (phen)···N <sub>7</sub> (Ad) | 0.0092 | 0.0312         |
| C <sub>6</sub> -CH <sub>3</sub> (phen)···N <sub>7</sub> (Au) | 0.0092 | 0.0314         |
| C <sub>6</sub> -CH <sub>3</sub> (phen)···O <sub>5</sub> (Td) | 0.0091 | 0.0314         |
| C <sub>3</sub> -CH <sub>3</sub> (Td)···C <sub>7</sub> (phen) | 0.0063 | 0.0192         |

**Table S8.** Electron Density ( $\rho$ ) and Laplacian ( $\nabla^2\rho$ ) in a.u. on all BCPs corresponding to weak interactions found in (AT/3,4,7,8-Me<sub>4</sub>phen/TA)mg system.

| BCP's                                                                         | $\rho$ | $\nabla^2\rho$ |
|-------------------------------------------------------------------------------|--------|----------------|
| N <sub>6</sub> -H···O <sub>5</sub> (u)                                        | 0.0270 | 0.0837         |
| N <sub>6</sub> -H···O <sub>5</sub> (d)                                        | 0.0243 | 0.0738         |
| N <sub>7</sub> ···H-N <sub>6</sub> (u)                                        | 0.0517 | 0.1130         |
| N <sub>7</sub> ···H-N <sub>6</sub> (d)                                        | 0.0471 | 0.1098         |
| C <sub>8</sub> -H···O <sub>8</sub> (u)                                        | 0.0073 | 0.0266         |
| C <sub>8</sub> -H···O <sub>8</sub> (d)                                        | 0.0061 | 0.0227         |
| C <sub>2</sub> (Tu)···C <sub>4</sub> (phen)                                   | 0.0080 | 0.0242         |
| C <sub>7</sub> (Tu)···C <sub>12</sub> (phen)                                  | 0.0068 | 0.0247         |
| C <sub>4</sub> (Tu)···C <sub>5</sub> (phen)                                   | 0.0062 | 0.0205         |
| C <sub>8</sub> (Au)···C <sub>9</sub> (phen)                                   | 0.0072 | 0.0225         |
| N <sub>7</sub> (Au)···C <sub>7</sub> (phen)                                   | 0.0069 | 0.0191         |
| N <sub>9</sub> (Ad)···CH <sub>3</sub> -C <sub>4</sub> (phen)                  | 0.0075 | 0.0264         |
| N <sub>7</sub> (Ad)···C <sub>5</sub> (phen)                                   | 0.0056 | 0.0158         |
| N <sub>5</sub> (Ad)···C <sub>5</sub> (phen)                                   | 0.0055 | 0.0161         |
| O <sub>8</sub> (Td)···C <sub>2</sub> (phen)                                   | 0.0081 | 0.0271         |
| C <sub>7</sub> (Td)···C <sub>12</sub> (phen)                                  | 0.0086 | 0.0331         |
| C <sub>2</sub> (Td)···N <sub>10</sub> (phen)                                  | 0.0082 | 0.0259         |
| C <sub>3</sub> (Td)···C <sub>14</sub> (phen)                                  | 0.0071 | 0.0192         |
| C <sub>4</sub> -CH <sub>3</sub> (phen)···C <sub>2</sub> (Tu)                  | 0.0065 | 0.0206         |
| C <sub>4</sub> -CH <sub>3</sub> (phen)···CH <sub>3</sub> -C <sub>3</sub> (Tu) | 0.0060 | 0.0219         |
| C <sub>7</sub> -CH <sub>3</sub> (phen)···N <sub>6</sub> (Au)                  | 0.0093 | 0.0268         |
| C <sub>7</sub> -CH <sub>3</sub> (phen)···O <sub>5</sub> (Td)                  | 0.0071 | 0.0245         |
| C <sub>8</sub> -CH <sub>3</sub> (phen)···C <sub>10</sub> (Au)                 | 0.0086 | 0.0324         |
| C <sub>3</sub> -CH <sub>3</sub> (Td)···C <sub>7</sub> (phen)                  | 0.0072 | 0.0235         |

**Table S9.** Electron Density ( $\rho$ ) and Laplacian ( $\nabla^2\rho$ ) in a.u. on all BCPs corresponding to weak interactions found in (AT/phen/TA)mg system.

| BCP's                                          | $\rho$ | $\nabla^2\rho$ |
|------------------------------------------------|--------|----------------|
| N <sub>6</sub> -H···O <sub>5</sub> (u)         | 0.0260 | 0.0804         |
| N <sub>6</sub> -H···O <sub>5</sub> (d)         | 0.0259 | 0.0816         |
| N <sub>7</sub> ···H-N <sub>6</sub> (u)         | 0.0490 | 0.1100         |
| N <sub>7</sub> ···H-N <sub>6</sub> (d)         | 0.0395 | 0.0992         |
| C <sub>8</sub> -H···O <sub>8</sub> (u)         | 0.0066 | 0.0244         |
| C <sub>8</sub> -H···O <sub>8</sub> (d)         | 0.0060 | 0.0220         |
| CH <sub>3</sub> (Tu)···H-C <sub>5</sub> (phen) | 0.0035 | 0.0120         |
| CH <sub>3</sub> (Tu)···N <sub>1</sub> (Ad)     | 0.0016 | 0.0056         |
| CH <sub>3</sub> (Td)···C <sub>8</sub> (phen)   | 0.0064 | 0.0200         |
| C <sub>2</sub> (Tu)···C <sub>4</sub> (phen)    | 0.0084 | 0.0252         |
| C <sub>7</sub> (Tu)···C <sub>12</sub> (phen)   | 0.0066 | 0.0232         |
| C <sub>4</sub> (Tu)···C <sub>5</sub> (phen)    | 0.0076 | 0.0256         |
| N <sub>6</sub> (Au)···C <sub>6</sub> (phen)    | 0.0038 | 0.0108         |
| N <sub>7</sub> (Au)···C <sub>7</sub> (phen)    | 0.0081 | 0.0240         |
| C <sub>8</sub> (Au)···C <sub>8</sub> (phen)    | 0.0068 | 0.0208         |

|                                              |        |        |
|----------------------------------------------|--------|--------|
| C <sub>10</sub> (Au)···C <sub>8</sub> (phen) | 0.0059 | 0.0184 |
| N <sub>9</sub> (Ad)···H <sub>4</sub> (phen)  | 0.0073 | 0.0232 |
| C <sub>4</sub> (Ad)···H <sub>5</sub> (phen)  | 0.0065 | 0.0208 |
| N <sub>7</sub> (Ad)···C <sub>5</sub> (phen)  | 0.0083 | 0.0240 |
| N <sub>6</sub> (Ad)···C <sub>6</sub> (phen)  | 0.0041 | 0.0116 |
| C <sub>7</sub> (Td)···C <sub>12</sub> (phen) | 0.0085 | 0.0324 |
| N <sub>1</sub> (Td)···C <sub>12</sub> (phen) | 0.0084 | 0.0276 |
| C <sub>3</sub> (Td)···C <sub>14</sub> (phen) | 0.0061 | 0.0152 |
| C <sub>2</sub> (Td)···N <sub>10</sub> (phen) | 0.0086 | 0.0276 |
| C <sub>3</sub> (Td)···C <sub>8</sub> (phen)  | 0.0060 | 0.0160 |

**Table S10.** Electron Density ( $\rho$ ) and Laplacian ( $\nabla^2\rho$ ) in a.u. on all BCPs corresponding to weak interactions found in (AT/4-Mephen/TA)MG system.

| BCP's                                                        | $\rho$ | $\nabla^2\rho$ |
|--------------------------------------------------------------|--------|----------------|
| N <sub>6</sub> -H···O <sub>5</sub> (u)                       | 0.0228 | 0.0707         |
| N <sub>6</sub> -H···O <sub>5</sub> (d)                       | 0.0232 | 0.0721         |
| N <sub>7</sub> ···H-N <sub>6</sub> (u)                       | 0.0520 | 0.1101         |
| N <sub>7</sub> ···H-N <sub>6</sub> (d)                       | 0.0526 | 0.1103         |
| C <sub>8</sub> -H···O <sub>8</sub> (u)                       | 0.0069 | 0.0249         |
| C <sub>8</sub> -H···O <sub>8</sub> (d)                       | 0.0070 | 0.0252         |
| C <sub>10</sub> (Au)···C <sub>4</sub> (phen)                 | 0.0083 | 0.0245         |
| C <sub>8</sub> (Au)···C <sub>5</sub> (phen)                  | 0.0066 | 0.0201         |
| N <sub>6</sub> (Au)···N <sub>1</sub> (phen)                  | 0.0066 | 0.0190         |
| N <sub>6</sub> (Au)···N <sub>10</sub> (phen)                 | 0.0050 | 0.0141         |
| N <sub>7</sub> (Au)···C <sub>12</sub> (phen)                 | 0.0074 | 0.0224         |
| N <sub>6</sub> (Tu)···C <sub>7</sub> (phen)                  | 0.0085 | 0.0243         |
| N <sub>6</sub> (Td)···C <sub>4</sub> (phen)                  | 0.0080 | 0.0222         |
| N <sub>6</sub> (Ad)···N <sub>1</sub> (phen)                  | 0.0044 | 0.0129         |
| N <sub>6</sub> (Ad)···N <sub>10</sub> (phen)                 | 0.0069 | 0.0194         |
| N <sub>7</sub> (Ad)···C <sub>11</sub> (phen)                 | 0.0075 | 0.0217         |
| C <sub>8</sub> (Ad)···C <sub>14</sub> (phen)                 | 0.0063 | 0.0195         |
| C <sub>10</sub> (Ad)···C <sub>7</sub> (phen)                 | 0.0078 | 0.0225         |
| C <sub>4</sub> -CH <sub>3</sub> (phen)···N <sub>9</sub> (Au) | 0.0082 | 0.0259         |
| C <sub>4</sub> -CH <sub>3</sub> (phen)···O <sub>8</sub> (Td) | 0.0101 | 0.0343         |

**Table S11.** Electron Density ( $\rho$ ) and Laplacian ( $\nabla^2\rho$ ) in a.u. on all BCPs corresponding to weak interactions found in (AT/5-Mephen/TA)MG system.

| BCP's                                                        | $\rho$ | $\nabla^2\rho$ |
|--------------------------------------------------------------|--------|----------------|
| N <sub>6</sub> -H···O <sub>5</sub> (u)                       | 0.0230 | 0.0715         |
| N <sub>6</sub> -H···O <sub>5</sub> (d)                       | 0.0232 | 0.0727         |
| N <sub>7</sub> ···H-N <sub>6</sub> (u)                       | 0.0515 | 0.1098         |
| N <sub>7</sub> ···H-N <sub>6</sub> (d)                       | 0.0521 | 0.1095         |
| C <sub>8</sub> -H···O <sub>8</sub> (u)                       | 0.0068 | 0.0246         |
| C <sub>8</sub> -H···O <sub>8</sub> (d)                       | 0.0068 | 0.0246         |
| C <sub>10</sub> (Au)···C <sub>4</sub> (phen)                 | 0.0080 | 0.0235         |
| N <sub>6</sub> (Au)···N <sub>1</sub> (phen)                  | 0.0066 | 0.0192         |
| N <sub>6</sub> (Au)···N <sub>10</sub> (phen)                 | 0.0049 | 0.0140         |
| N <sub>7</sub> (Au)···C <sub>12</sub> (phen)                 | 0.0075 | 0.0229         |
| C <sub>8</sub> (Au)···C <sub>5</sub> (phen)                  | 0.0070 | 0.0217         |
| O <sub>8</sub> (Tu)···C <sub>6</sub> (phen)                  | 0.0052 | 0.0173         |
| N <sub>6</sub> (Tu)···C <sub>7</sub> (phen)                  | 0.0086 | 0.0243         |
| N <sub>6</sub> (Td)···C <sub>4</sub> (phen)                  | 0.0084 | 0.0235         |
| N <sub>6</sub> (Ad)···N <sub>1</sub> (phen)                  | 0.0045 | 0.0132         |
| N <sub>6</sub> (Ad)···N <sub>10</sub> (phen)                 | 0.0069 | 0.0193         |
| N <sub>7</sub> (Ad)···C <sub>11</sub> (phen)                 | 0.0076 | 0.0222         |
| C <sub>8</sub> (Ad)···C <sub>6</sub> (phen)                  | 0.0065 | 0.0197         |
| C <sub>10</sub> (Ad)···C <sub>7</sub> (phen)                 | 0.0078 | 0.0226         |
| C <sub>5</sub> -CH <sub>3</sub> (phen)···N <sub>9</sub> (Au) | 0.0062 | 0.0190         |
| C <sub>5</sub> -CH <sub>3</sub> (phen)···O <sub>8</sub> (Td) | 0.0097 | 0.0335         |

**Table S12.** Electron Density ( $\rho$ ) and Laplacian ( $\nabla^2\rho$ ) in a.u. on all BCPs corresponding to weak interactions found in (AT/4,7-Me<sub>2</sub>phen/TA)MG system.

| BCP's                                                        | $\rho$ | $\nabla^2\rho$ |
|--------------------------------------------------------------|--------|----------------|
| N <sub>6</sub> -H···O <sub>5</sub> (u)                       | 0.0232 | 0.0724         |
| N <sub>6</sub> -H···O <sub>5</sub> (d)                       | 0.0220 | 0.0674         |
| N <sub>7</sub> ···H-N <sub>6</sub> (u)                       | 0.0502 | 0.1088         |
| N <sub>7</sub> ···H-N <sub>6</sub> (d)                       | 0.0508 | 0.1088         |
| C <sub>8</sub> -H···O <sub>8</sub> (u)                       | 0.0063 | 0.0232         |
| C <sub>8</sub> -H···O <sub>8</sub> (d)                       | 0.0066 | 0.0238         |
| C <sub>10</sub> (Au)···C <sub>4</sub> (phen)                 | 0.0083 | 0.0247         |
| N <sub>3</sub> (Au)···C <sub>2</sub> (phen)                  | 0.0070 | 0.0205         |
| N <sub>6</sub> (Au)···N <sub>1</sub> (phen)                  | 0.0067 | 0.0194         |
| N <sub>6</sub> (Au)···N <sub>10</sub> (phen)                 | 0.0052 | 0.0150         |
| N <sub>7</sub> (Au)···C <sub>12</sub> (phen)                 | 0.0076 | 0.0234         |
| C <sub>8</sub> (Au)···C <sub>5</sub> (phen)                  | 0.0070 | 0.0215         |
| C <sub>4</sub> (Tu)···C <sub>9</sub> (phen)                  | 0.0072 | 0.0251         |
| C <sub>3</sub> (Tu)···C <sub>8</sub> (phen)                  | 0.0067 | 0.0171         |
| C <sub>7</sub> (Tu)···C <sub>7</sub> (phen)                  | 0.0078 | 0.0276         |
| N <sub>1</sub> (Tu)···CH <sub>3</sub> -C <sub>7</sub> (phen) | 0.0064 | 0.0214         |
| C <sub>4</sub> (Td)···C <sub>13</sub> (phen)                 | 0.0072 | 0.0244         |
| C <sub>7</sub> (Td)···C <sub>6</sub> (phen)                  | 0.0080 | 0.0276         |
| N <sub>6</sub> (Ad)···N <sub>1</sub> (phen)                  | 0.0068 | 0.0205         |
| N <sub>6</sub> (Ad)···N <sub>10</sub> (phen)                 | 0.0087 | 0.0266         |

|                                                              |        |        |
|--------------------------------------------------------------|--------|--------|
| C <sub>4</sub> (Ad)···C <sub>9</sub> (phen)                  | 0.0087 | 0.0258 |
| C <sub>8</sub> (Ad)···C <sub>8</sub> (phen)                  | 0.0072 | 0.0215 |
| C <sub>4</sub> -CH <sub>3</sub> (phen)···N <sub>9</sub> (Au) | 0.0078 | 0.0247 |
| C <sub>4</sub> -CH <sub>3</sub> (phen)···C <sub>3</sub> (Td) | 0.0066 | 0.0196 |
| C <sub>7</sub> -CH <sub>3</sub> (phen)···O <sub>8</sub> (Tu) | 0.0091 | 0.0309 |
| C <sub>7</sub> -CH <sub>3</sub> (phen)···O <sub>8</sub> (Td) | 0.0114 | 0.0393 |
| C <sub>3</sub> -CH <sub>3</sub> (Td)···C <sub>4</sub> (phen) | 0.0073 | 0.0224 |

**Table S13.** Electron Density ( $\rho$ ) and Laplacian ( $\nabla^2\rho$ ) in a.u. on all BCPs corresponding to weak interactions found in (AT/5,6-Me<sub>2</sub>phen/TA)MG system.

| BCP's                                        | $\rho$ | $\nabla^2\rho$ |
|----------------------------------------------|--------|----------------|
| N <sub>6</sub> -H···O <sub>5</sub> (u)       | 0.0231 | 0.0722         |
| N <sub>6</sub> -H···O <sub>5</sub> (d)       | 0.0221 | 0.0673         |
| N <sub>7</sub> ···H-N <sub>6</sub> (u)       | 0.0499 | 0.1082         |
| N <sub>7</sub> ···H-N <sub>6</sub> (d)       | 0.0508 | 0.1089         |
| C <sub>8</sub> -H···O <sub>8</sub> (u)       | 0.0064 | 0.0236         |
| C <sub>8</sub> -H···O <sub>8</sub> (d)       | 0.0066 | 0.0242         |
| C <sub>10</sub> (Au)···C <sub>4</sub> (phen) | 0.0078 | 0.0225         |
| N <sub>3</sub> (Au)···C <sub>2</sub> (phen)  | 0.0068 | 0.0200         |
| N <sub>6</sub> (Au)···N <sub>1</sub> (phen)  | 0.0070 | 0.0200         |
| N <sub>6</sub> (Au)···N <sub>10</sub> (phen) | 0.0052 | 0.0152         |
| N <sub>7</sub> (Au)···C <sub>12</sub> (phen) | 0.0078 | 0.0235         |
| C <sub>8</sub> (Au)···C <sub>5</sub> (phen)  | 0.0070 | 0.0216         |
| N <sub>6</sub> (Tu)···C <sub>8</sub> (phen)  | 0.0076 | 0.0204         |
| C <sub>4</sub> (Tu)···C <sub>9</sub> (phen)  | 0.0076 | 0.0276         |
| C <sub>4</sub> (Td)···C <sub>13</sub> (phen) | 0.0070 | 0.0239         |
| C <sub>7</sub> (Td)···C <sub>6</sub> (phen)  | 0.0078 | 0.0280         |
| N <sub>6</sub> (Ad)···N <sub>1</sub> (phen)  | 0.0078 | 0.0228         |
| C <sub>5</sub> (Ad)···N <sub>10</sub> (phen) | 0.0086 | 0.0303         |
| C <sub>4</sub> (Ad)···C <sub>9</sub> (phen)  | 0.0080 | 0.0238         |

|                                                              |        |        |
|--------------------------------------------------------------|--------|--------|
| C <sub>5</sub> -CH <sub>3</sub> (phen)···N <sub>9</sub> (Au) | 0.0084 | 0.0256 |
| C <sub>6</sub> -CH <sub>3</sub> (phen)···O <sub>8</sub> (Tu) | 0.0122 | 0.0412 |
| C <sub>5</sub> -CH <sub>3</sub> (phen)···C <sub>2</sub> (Td) | 0.0073 | 0.0222 |
| C <sub>6</sub> -CH <sub>3</sub> (phen)···O <sub>8</sub> (Td) | 0.0111 | 0.0367 |
| C <sub>3</sub> -CH <sub>3</sub> (Td)···C <sub>4</sub> (phen) | 0.0070 | 0.0219 |

**Table S14.** Electron Density ( $\rho$ ) and Laplacian ( $\nabla^2\rho$ ) in a.u. on all BCPs corresponding to weak interactions found in (AT/3,4,7,8-Me<sub>4</sub>phen/TA)MG system.

| BCP's                                        | $\rho$ | $\nabla^2\rho$ |
|----------------------------------------------|--------|----------------|
| N <sub>6</sub> -H···O <sub>5</sub> (u)       | 0.0215 | 0.0654         |
| N <sub>6</sub> -H···O <sub>5</sub> (d)       | 0.0243 | 0.0766         |
| N <sub>7</sub> ···H-N <sub>6</sub> (u)       | 0.0518 | 0.1100         |
| N <sub>7</sub> ···H-N <sub>6</sub> (d)       | 0.0522 | 0.1107         |
| C <sub>8</sub> -H···O <sub>8</sub> (u)       | 0.0063 | 0.0232         |
| C <sub>8</sub> -H···O <sub>8</sub> (d)       | 0.0064 | 0.0234         |
| C <sub>4</sub> (Au)···C <sub>2</sub> (phen)  | 0.0089 | 0.0267         |
| N <sub>6</sub> (Au)···N <sub>1</sub> (phen)  | 0.0088 | 0.0284         |
| N <sub>6</sub> (Au)···N <sub>10</sub> (phen) | 0.0083 | 0.0249         |
| C <sub>4</sub> (Tu)···C <sub>14</sub> (phen) | 0.0072 | 0.0248         |
| C <sub>7</sub> (Tu)···C <sub>5</sub> (phen)  | 0.0076 | 0.0261         |
| C <sub>7</sub> (Td)···C <sub>4</sub> (phen)  | 0.0077 | 0.0273         |
| C <sub>4</sub> (Td)···C <sub>2</sub> (phen)  | 0.0072 | 0.0255         |
| N <sub>6</sub> (Ad)···N <sub>1</sub> (phen)  | 0.0048 | 0.0139         |
| N <sub>6</sub> (Ad)···N <sub>10</sub> (phen) | 0.0070 | 0.0198         |
| C <sub>10</sub> (Ad)···C <sub>7</sub> (phen) | 0.0081 | 0.0237         |
| C <sub>8</sub> (Ad)···C <sub>6</sub> (phen)  | 0.0069 | 0.0215         |
| N <sub>7</sub> (Ad)···C <sub>11</sub> (phen) | 0.0077 | 0.0228         |



|                                                              |        |        |
|--------------------------------------------------------------|--------|--------|
| C <sub>3</sub> -CH <sub>3</sub> (phen)···N <sub>9</sub> (Au) | 0.0107 | 0.0339 |
| C <sub>4</sub> -CH <sub>3</sub> (phen)···O <sub>8</sub> (Tu) | 0.0118 | 0.0403 |
| C <sub>7</sub> -CH <sub>3</sub> (phen)···C <sub>3</sub> (Tu) | 0.0070 | 0.0215 |
| C <sub>3</sub> -CH <sub>3</sub> (Tu)···C <sub>7</sub> (phen) | 0.0070 | 0.0215 |
| C <sub>8</sub> -CH <sub>3</sub> (phen)···C <sub>2</sub> (Ad) | 0.0069 | 0.0244 |
| C <sub>7</sub> -CH <sub>3</sub> (phen)···N <sub>9</sub> (Ad) | 0.0079 | 0.0247 |
| C <sub>4</sub> -CH <sub>3</sub> (phen)···O <sub>8</sub> (Td) | 0.0092 | 0.0308 |
| C <sub>3</sub> -CH <sub>3</sub> (phen)···C <sub>2</sub> (Td) | 0.0087 | 0.0302 |

**Table S15.** Electron Density ( $\rho$ ) and Laplacian ( $\nabla^2\rho$ ) in a.u. on all BCPs corresponding to weak interactions found in (AT/phen/TA)MG system.

| BCP's                                        | $\rho$ | $\nabla^2\rho$ |
|----------------------------------------------|--------|----------------|
| N <sub>6</sub> -H···O <sub>5</sub> (u)       | 0.0226 | 0.0704         |
| N <sub>6</sub> -H···O <sub>5</sub> (d)       | 0.0226 | 0.0692         |
| N <sub>7</sub> ···H-N <sub>6</sub> (u)       | 0.0500 | 0.1084         |
| N <sub>7</sub> ···H-N <sub>6</sub> (d)       | 0.0498 | 0.1080         |
| C <sub>8</sub> -H···O <sub>8</sub> (u)       | 0.0064 | 0.0232         |
| C <sub>8</sub> -H···O <sub>8</sub> (d)       | 0.0060 | 0.0224         |
| CH <sub>3</sub> (Td)···C <sub>4</sub> (phen) | 0.0067 | 0.0208         |
| C <sub>10</sub> (Au)···C <sub>4</sub> (phen) | 0.0077 | 0.0220         |
| N <sub>3</sub> (Au)···C <sub>2</sub> (phen)  | 0.0069 | 0.0204         |
| C <sub>5</sub> (Au)···C <sub>12</sub> (phen) | 0.0078 | 0.0264         |
| C <sub>8</sub> (Au)···C <sub>5</sub> (phen)  | 0.0069 | 0.0216         |

|                                              |        |        |
|----------------------------------------------|--------|--------|
| N <sub>6</sub> (Au)···N <sub>10</sub> (phen) | 0.0058 | 0.0164 |
| O <sub>8</sub> (Tu)···C <sub>6</sub> (phen)  | 0.0064 | 0.0216 |
| N <sub>6</sub> (Tu)···C <sub>7</sub> (phen)  | 0.0083 | 0.0236 |
| O <sub>5</sub> (Tu)···C <sub>9</sub> (phen)  | 0.0068 | 0.0232 |
| C <sub>4</sub> (Tu)···C <sub>8</sub> (phen)  | 0.0070 | 0.0216 |
| C <sub>3</sub> (Tu)···C <sub>8</sub> (phen)  | 0.0069 | 0.0180 |
| C <sub>4</sub> (Td)···C <sub>13</sub> (phen) | 0.0072 | 0.0252 |
| C <sub>7</sub> (Td)···C <sub>6</sub> (phen)  | 0.0084 | 0.0304 |
| N <sub>6</sub> (Ad)···N <sub>1</sub> (phen)  | 0.0073 | 0.0212 |
| C <sub>5</sub> (Ad)···N <sub>10</sub> (phen) | 0.0087 | 0.0304 |
| C <sub>4</sub> (Ad)···C <sub>9</sub> (phen)  | 0.0082 | 0.0240 |
| C <sub>8</sub> (Ad)···C <sub>8</sub> (phen)  | 0.0070 | 0.0212 |

---

**Table S16.** Cartesian coordinates of: phen (M06-2X/6-31+G(d,p)), 4-Mephen (M06-2X/6-31+G(d,p)), 5-Mephen (M06-2X/6-31+G(d,p)), 4,7-Me<sub>2</sub>phen (M06-2X/6-31+G(d,p)), 5,6-Me<sub>2</sub>phen (M06-2X/6-31+G(d,p)), 3,4,7,8-Me<sub>4</sub>phen (M06-2X/6-31+G(d,p)), AT/TA (M06-2X/6-31+G(d,p)), (AT/phen/TA)mg (M06-2X/6-31+G(d,p)), (AT/4-Mephen/TA)mg (M06-2X/6-31+G(d,p)), (AT/5-Mephen/TA)mg (M06-2X/6-31+G(d,p)), (AT/4,7-Me<sub>2</sub>phen/TA)mg (M06-2X/6-31+G(d,p)), (AT/5,6-Me<sub>2</sub>phen/TA)mg (M06-2X/6-31+G(d,p)), (AT/3,4,7,8-Me<sub>4</sub>phen/TA)mg (M06-2X/6-31+G(d,p)), (AT/phen/TA)MG (M06-2X/6-31+G(d,p)), (AT/4-Mephen/TA)MG (M06-2X/6-31+G(d,p)), (AT/5-Mephen/TA)MG (M06-2X/6-31+G(d,p)), (AT/4,7-Me<sub>2</sub>phen/TA)MG (M06-2X/6-31+G(d,p)), (AT/5,6-Me<sub>2</sub>phen/TA)MG (M06-2X/6-31+G(d,p)), (AT/3,4,7,8-Me<sub>4</sub>phen/TA)MG (M06-2X/6-31+G(d,p)).

22

**phen (M06-2X/6-31+G(d,p))**

|   |           |           |          |
|---|-----------|-----------|----------|
| C | -5.088753 | 0.053182  | 1.700749 |
| C | -4.737382 | -1.311917 | 1.744765 |
| N | -3.496367 | -1.755479 | 1.730055 |
| C | -2.497779 | -0.850526 | 1.669292 |

|   |           |           |          |
|---|-----------|-----------|----------|
| C | -2.736317 | 0.544554  | 1.620874 |
| C | -4.076880 | 0.982714  | 1.638353 |
| C | -1.637785 | 1.469323  | 1.556388 |
| C | -0.357603 | 1.024403  | 1.540871 |
| C | -0.068078 | -0.382837 | 1.588557 |
| C | -1.119225 | -1.329657 | 1.652953 |
| N | -0.895856 | -2.659254 | 1.699031 |
| C | 0.352765  | -3.080985 | 1.683618 |
| C | 1.473796  | -2.227662 | 1.621736 |
| C | 1.255283  | -0.870575 | 1.573898 |
| H | -4.290926 | 2.047840  | 1.602361 |
| H | 2.082747  | -0.167373 | 1.525166 |
| H | -5.516354 | -2.070073 | 1.794433 |
| H | -6.132115 | 0.348525  | 1.716485 |
| H | 0.494694  | -4.159161 | 1.722243 |
| H | 2.475529  | -2.643047 | 1.612572 |
| H | 0.473942  | 1.722189  | 1.492624 |
| H | -1.858450 | 2.532661  | 1.520504 |

25

#### 4-Mephen (M06-2X/6-31+G(d,p))

|   |           |           |          |
|---|-----------|-----------|----------|
| C | 0.103853  | -3.707595 | 2.989506 |
| N | -1.142123 | -3.381993 | 3.262126 |
| C | -1.442085 | -2.068561 | 3.342469 |
| C | -0.481545 | -1.045417 | 3.147531 |
| C | 0.856885  | -1.424109 | 2.854326 |
| C | 1.135339  | -2.772512 | 2.778200 |
| C | -2.821596 | -1.698229 | 3.644619 |
| C | -3.160716 | -0.327054 | 3.734099 |
| C | -2.157424 | 0.678258  | 3.529348 |
| C | -0.875396 | 0.334485  | 3.248758 |
| N | -3.728388 | -2.680883 | 3.828793 |
| C | -4.970988 | -2.337691 | 4.101466 |
| C | -5.416761 | -1.004032 | 4.213693 |
| C | -4.500261 | 0.003909  | 4.027472 |
| C | 1.930709  | -0.392549 | 2.635067 |
| H | -4.787807 | 1.049571  | 4.101973 |
| H | -5.673539 | -3.156516 | 4.243587 |
| H | -6.456094 | -0.793403 | 4.440875 |
| H | 0.320680  | -4.772510 | 2.930125 |
| H | 2.140582  | -3.118784 | 2.557324 |
| H | -0.130229 | 1.108370  | 3.097227 |
| H | -2.447592 | 1.722853  | 3.604144 |
| H | 2.887136  | -0.874351 | 2.423948 |
| H | 1.685643  | 0.260942  | 1.791699 |
| H | 2.056947  | 0.241437  | 3.518503 |

25

#### 5-Mephen (M06-2X/6-31+G(d,p))

|   |           |           |          |
|---|-----------|-----------|----------|
| C | 0.799566  | 0.926761  | 2.981966 |
| C | -0.528087 | 0.259866  | 3.222630 |
| C | -0.613022 | -1.186937 | 3.260672 |

C -1.852699 -1.837901 3.486357  
C -3.055003 -1.033226 3.681532  
C -2.936663 0.374482 3.637872  
C -1.659336 0.989172 3.406778  
N -4.230072 -1.658756 3.895073  
C -5.305756 -0.916104 4.068620  
C -5.302813 0.493313 4.044803  
C -4.106715 1.137895 3.827457  
C 0.521020 -2.006369 3.076661  
C 0.387083 -3.375979 3.121921  
C -0.892997 -3.912978 3.353305  
N -1.974253 -3.179784 3.529384  
H -1.614414 2.075938 3.381352  
H 1.493170 -1.557138 2.900373  
H -6.236656 -1.453306 4.238385  
H -6.225464 1.043229 4.195034  
H -1.032338 -4.991360 3.395120  
H 1.239292 -4.032503 2.983906  
H -4.047722 2.222938 3.799218  
H 0.686901 2.012603 2.984221  
H 1.526083 0.660135 3.756973  
H 1.224527 0.632499 2.016416

28

**4,7-Me<sub>2</sub>phen (M06-2X/6-31+G(d,p))**

N -3.737823 -2.572862 3.630952  
C -2.832354 -1.575464 3.535788  
C -3.191417 -0.206321 3.578647  
C -4.564906 0.129460 3.728834  
C -5.466718 -0.908689 3.823846  
C -5.002775 -2.237738 3.769345  
C -1.426729 -1.940430 3.382581  
C -0.453118 -0.917351 3.279438

C -0.863193 0.458012 3.327580  
C -2.170202 0.797379 3.470458  
N -1.114804 -3.253869 3.346155  
C 0.153495 -3.576448 3.208190  
C 1.199530 -2.639435 3.096773  
C 0.910390 -1.292137 3.130982  
C 1.996753 -0.256873 3.016019  
C -5.016825 1.564067 3.782105  
H -5.712508 -3.059650 3.843609  
H -6.528352 -0.711924 3.939856  
H 0.378684 -4.641051 3.181781  
H 2.223249 -2.984061 2.985009  
H -0.111778 1.236755 3.247970  
H -2.452497 1.844547 3.504152  
H 2.971914 -0.735371 2.908252  
H 1.837141 0.389730 2.147206  
H 2.028210 0.383886 3.903072  
H -6.100514 1.620090 3.900400  
H -4.555118 2.093588 4.621656  
H -4.746396 2.098522 2.865785

28

**5,6-Me<sub>2</sub>phen (M06-2X/6-31+G(d,p))**

C 4.633663 0.018446 3.764780  
C 3.260331 -0.276362 3.613994  
C 2.901905 -1.644432 3.616309  
N 3.796729 -2.642409 3.753095  
C 5.069317 -2.328120 3.891690  
C 5.544694 -1.005263 3.904355  
C 1.496696 -2.000649 3.463576  
C 0.544881 -0.964760 3.318499  
C 0.941136 0.435683 3.319639

C 2.260042 0.770041 3.463479  
N 1.170757 -3.307990 3.468547  
C -0.098110 -3.637830 3.331329  
C -1.131972 -2.697508 3.179469  
C -0.803649 -1.359779 3.173676  
H -1.584231 -0.616381 3.057941  
H 5.761908 -3.160374 3.999598  
H 6.604093 -0.804157 4.021532  
H -0.322639 -4.702487 3.340361  
H -2.160060 -3.025476 3.069959  
C -0.168469 1.446032 3.156906  
C 2.769583 2.190854 3.477949  
H 4.977209 1.046650 3.771449  
H 0.185061 2.473414 3.165772  
H -0.903847 1.345973 3.962304  
H -0.697721 1.290245 2.210798  
H 3.286032 2.406917 4.419243  
H 1.980118 2.928669 3.364116  
H 3.488037 2.352346 2.667246

34

**3,4,7,5-Me<sub>2</sub>phen (M06-2X/6-31+G(d,p))**

C -3.919461 2.893299 3.500863  
C -3.996209 1.393424 3.627407  
C -2.822503 0.606546 3.469036  
C -2.920643 -0.799009 3.592758  
N -4.088846 -1.419452 3.855758  
C -5.158016 -0.668531 3.997052  
C -5.189787 0.742028 3.896911  
C -1.725562 -1.620757 3.432940  
C -0.484605 -1.001021 3.156265  
C -0.429722 0.430237 3.038374

C -1.542071 1.195098 3.187260  
N -1.851610 -2.957741 3.556729  
C -0.768138 -3.686910 3.410725  
C 0.526112 -3.188146 3.133453  
C 0.670820 -1.815621 3.003373  
C 2.005503 -1.180934 2.708016  
H -6.087691 -1.197362 4.208890  
C -6.500962 1.461617 4.085033  
H -0.900397 -4.764067 3.516096  
C 1.671840 -4.157836 2.994249  
H 0.520263 0.908982 2.825909  
H -1.463055 2.272765 3.091407  
H 2.795093 -1.926471 2.617839  
H 1.971047 -0.614478 1.771594  
H 2.292059 -0.483686 3.502154  
H -4.892663 3.360559 3.648994  
H -3.229866 3.313943 4.240054  
H -3.555156 3.184617 2.510216  
H 2.454083 -3.968642 3.736212  
H 1.320670 -5.182488 3.136125  
H 2.133647 -4.098834 2.003561  
H -7.301185 0.745497 4.285457  
H -6.461680 2.160444 4.926650  
H -6.780723 2.031940 3.193599

60

**AT/TA (M06-2X/6-31+G(d,p))**

C 2.186042 -1.653973 2.656962  
C 0.784687 -1.469258 3.026988  
N -0.043589 -2.559200 2.824804  
C 0.288634 -3.732699 2.195938  
N 1.629579 -3.857030 1.907866

|   |           |           |           |
|---|-----------|-----------|-----------|
| C | 2.528312  | -2.831542 | 2.092492  |
| O | 0.333073  | -0.426457 | 3.499238  |
| O | -0.535628 | -4.598054 | 1.926633  |
| C | 3.139900  | -0.533073 | 2.932191  |
| N | -2.757130 | -2.293280 | 3.505208  |
| C | -3.323258 | -1.082543 | 3.671563  |
| C | -4.735675 | -1.031972 | 3.715589  |
| C | -5.403608 | -2.235594 | 3.510838  |
| N | -4.854667 | -3.444018 | 3.308948  |
| C | -3.529762 | -3.380116 | 3.337039  |
| N | -6.733835 | -1.901649 | 3.551802  |
| C | -6.794867 | -0.544959 | 3.780627  |
| N | -5.618956 | 0.013651  | 3.881243  |
| N | -2.551925 | 0.004680  | 3.762662  |
| C | -3.289079 | -0.555704 | 0.471157  |
| C | -2.053168 | 0.217763  | 0.349491  |
| N | -0.912688 | -0.514285 | 0.082868  |
| C | -0.810744 | -1.878645 | -0.000000 |
| N | -1.992100 | -2.552707 | 0.224599  |
| C | -3.185841 | -1.902394 | 0.440447  |
| O | -1.991721 | 1.441654  | 0.467337  |
| O | 0.247066  | -2.448948 | -0.234785 |
| C | -4.571715 | 0.189551  | 0.673279  |
| N | 1.569934  | 0.729927  | -0.000000 |
| C | 1.747168  | 2.000722  | 0.404853  |
| C | 3.079465  | 2.463110  | 0.507117  |
| C | 4.076963  | 1.548675  | 0.178296  |
| N | 3.914991  | 0.278813  | -0.224358 |
| C | 2.630477  | -0.045970 | -0.285818 |
| N | 5.248355  | 2.236867  | 0.368441  |
| C | 4.902362  | 3.500960  | 0.790468  |
| N | 3.612221  | 3.676967  | 0.887296  |
| N | 0.683430  | 2.760880  | 0.687964  |



|   |           |           |           |
|---|-----------|-----------|-----------|
| H | -2.984830 | -4.309794 | 3.183814  |
| H | -2.988676 | 0.910264  | 3.841717  |
| H | -1.533952 | -0.071611 | 3.702634  |
| H | -7.506852 | -2.543611 | 3.456301  |
| H | -7.740286 | -0.026964 | 3.862899  |
| H | -1.048473 | -2.458431 | 3.101267  |
| H | 3.541018  | -3.035735 | 1.759949  |
| H | 4.121470  | -0.740097 | 2.499777  |
| H | 2.758464  | 0.402496  | 2.512068  |
| H | 3.246573  | -0.376188 | 4.010186  |
| H | 1.868658  | -4.655113 | 1.336552  |
| H | 2.379383  | -1.059871 | -0.590385 |
| H | 0.831280  | 3.702865  | 1.014181  |
| H | -0.261532 | 2.379537  | 0.620900  |
| H | 6.177366  | 1.874837  | 0.212883  |
| H | 5.651705  | 4.248531  | 1.010682  |
| H | 0.000000  | 0.000000  | 0.000000  |
| H | -4.045260 | -2.550086 | 0.591491  |
| H | -5.403542 | -0.502900 | 0.833497  |
| H | -4.794789 | 0.816385  | -0.195639 |
| H | -4.503148 | 0.852931  | 1.540369  |
| H | -1.898649 | -3.555502 | 0.356562  |

82

**(AT/phen/TA)mg (M06-2X/6-31+G(d,p))**

|   |           |           |          |
|---|-----------|-----------|----------|
| N | 1.475444  | 3.345550  | 0.522028 |
| C | 1.173283  | 2.014519  | 0.319298 |
| C | 2.322880  | 1.229772  | 0.280659 |
| N | 3.351429  | 2.120917  | 0.462242 |
| C | 2.779170  | 3.365795  | 0.598540 |
| C | -0.053232 | 1.331559  | 0.170581 |
| N | 0.000000  | 0.000000  | 0.000000 |
| C | 1.185592  | -0.636027 | 0.000000 |
| N | 2.392867  | -0.099395 | 0.129175 |
| N | -1.243697 | 1.947452  | 0.229193 |
| N | -2.301306 | -1.566059 | 0.046091 |
| C | -2.043313 | -2.913316 | 0.159009 |
| N | -3.186175 | -3.692961 | 0.245273 |

|   |           |           |           |
|---|-----------|-----------|-----------|
| C | -4.455460 | -3.171431 | 0.206150  |
| C | -4.694863 | -1.849184 | 0.075713  |
| C | -3.537366 | -0.958024 | -0.011065 |
| O | -0.921540 | -3.382992 | 0.173860  |
| O | -3.630679 | 0.265464  | -0.123963 |
| C | -6.061203 | -1.236538 | 0.068938  |
| C | -2.856329 | -4.827831 | 3.588057  |
| N | -1.836509 | -3.997695 | 3.505257  |
| C | -2.101706 | -2.681980 | 3.335396  |
| C | -3.421793 | -2.177063 | 3.265350  |
| C | -4.488812 | -3.097730 | 3.350813  |
| C | -4.209502 | -4.433552 | 3.508078  |
| C | -0.986299 | -1.744371 | 3.266944  |
| C | -1.265750 | -0.356992 | 3.189944  |
| C | -2.620936 | 0.110957  | 3.105618  |
| C | -3.655009 | -0.767087 | 3.126875  |
| C | -0.172722 | 0.536688  | 3.199998  |
| C | 1.105182  | 0.032706  | 3.237735  |
| C | 1.270915  | -1.367390 | 3.277925  |
| N | 0.273647  | -2.229614 | 3.311250  |
| N | -5.020871 | -0.079857 | 5.930424  |
| C | -5.877705 | -1.063027 | 5.608164  |
| N | -6.948706 | -0.990352 | 4.824526  |
| C | -7.127455 | 0.253896  | 4.356104  |
| C | -6.322653 | 1.364182  | 4.596846  |
| C | -5.193958 | 1.153156  | 5.420947  |
| N | -8.109088 | 0.717180  | 3.516163  |
| C | -7.847683 | 2.051882  | 3.299290  |
| N | -6.783884 | 2.477436  | 3.925189  |
| N | -4.304695 | 2.117104  | 5.694686  |
| N | -2.381901 | -0.986231 | 6.477411  |
| C | -1.381539 | -0.032511 | 6.504279  |
| C | -0.013098 | -0.542084 | 6.505067  |
| C | 0.152619  | -1.875760 | 6.369538  |
| N | -0.901501 | -2.754061 | 6.314497  |
| C | -2.221932 | -2.349967 | 6.375123  |
| O | -1.665551 | 1.166405  | 6.524209  |
| C | 1.111524  | 0.440681  | 6.614082  |
| O | -3.157771 | -3.130570 | 6.334027  |
| H | -5.634406 | -2.037790 | 6.026879  |
| H | -4.417022 | 3.011751  | 5.243045  |
| H | -3.409175 | 1.873038  | 6.122382  |
| H | -8.876800 | 0.175221  | 3.148256  |
| H | -8.481891 | 2.656447  | 2.665900  |
| H | -3.363469 | -0.645781 | 6.423388  |
| H | 1.134615  | -2.330589 | 6.291942  |
| H | 2.071864  | -0.048117 | 6.428888  |
| H | 0.981016  | 1.248810  | 5.889586  |
| H | 1.135337  | 0.898133  | 7.608271  |
| H | -0.756949 | -3.714751 | 6.028385  |
| H | 1.123538  | -1.716932 | -0.107494 |
| H | -1.263646 | 2.953836  | 0.286422  |
| H | -2.106902 | 1.423363  | 0.068128  |
| H | 4.334358  | 1.892039  | 0.474721  |
| H | 3.380482  | 4.251254  | 0.751591  |
| H | -1.446395 | -0.956192 | 0.000000  |
| H | -5.257671 | -3.895938 | 0.304954  |
| H | -6.833199 | -2.007187 | 0.138348  |
| H | -3.026355 | -4.679235 | 0.396154  |

|   |           |           |           |
|---|-----------|-----------|-----------|
| H | -0.360221 | 1.607543  | 3.163050  |
| H | -5.512297 | -2.730201 | 3.308525  |
| H | 2.273805  | -1.791551 | 3.287740  |
| H | 1.973939  | 0.684021  | 3.229529  |
| H | -2.607946 | -5.876977 | 3.740348  |
| H | -4.998215 | -5.172757 | 3.601195  |
| H | -4.682838 | -0.419051 | 3.043255  |
| H | -2.797138 | 1.179202  | 3.010683  |
| H | -6.174123 | -0.547068 | 0.913276  |
| H | -6.222467 | -0.652163 | -0.841315 |

85

**(AT/4-Mephen/TA)mg (M06-2X/6-31+G(d,p))**

|   |           |           |           |
|---|-----------|-----------|-----------|
| N | -2.821481 | 0.226632  | -6.277781 |
| C | -3.846066 | 1.137828  | -6.410718 |
| N | -3.424857 | 2.396208  | -6.798274 |
| C | -2.110525 | 2.702386  | -7.056344 |
| C | -1.116197 | 1.795372  | -6.945515 |
| C | -1.470746 | 0.467860  | -6.444173 |
| O | -5.015788 | 0.866960  | -6.200895 |
| O | -0.645892 | -0.405512 | -6.169075 |
| C | 0.320537  | 2.080612  | -7.257003 |
| H | -3.091725 | -0.707089 | -5.906637 |
| H | -1.925003 | 3.729473  | -7.353077 |
| H | 0.464401  | 3.140857  | -7.480446 |
| H | -4.125955 | 3.123381  | -6.739489 |
| H | 0.958141  | 1.811739  | -6.410327 |
| H | 0.657252  | 1.490046  | -8.114873 |
| N | -2.770151 | -4.162312 | -1.963126 |
| C | -3.319419 | -3.518717 | -3.055538 |
| C | -4.709790 | -3.568604 | -3.020456 |
| N | -5.002500 | -4.288196 | -1.887986 |
| C | -3.804660 | -4.607668 | -1.298030 |
| N | -5.563700 | -2.995394 | -3.879782 |
| C | -4.914807 | -2.333908 | -4.831470 |
| N | -3.586776 | -2.216124 | -5.001283 |
| C | -2.740612 | -2.795557 | -4.126437 |
| N | -1.421573 | -2.638910 | -4.276245 |
| H | -5.521096 | -1.795931 | -5.556587 |
| H | -0.778192 | -2.993766 | -3.573634 |
| H | -1.082576 | -1.990957 | -4.988107 |
| H | -5.928794 | -4.510316 | -1.553984 |
| H | -3.756057 | -5.165150 | -0.372936 |
| C | 2.056926  | -1.137431 | -1.233056 |
| N | 2.339726  | -0.014026 | -0.558970 |
| C | 1.249079  | 0.497143  | 0.000000  |
| N | 0.000000  | 0.000000  | 0.000000  |
| C | -0.248231 | -1.169873 | -0.622404 |
| C | 0.819524  | -1.763902 | -1.337766 |
| N | 0.885503  | -2.865201 | -2.169605 |
| C | 2.137150  | -2.907346 | -2.547200 |
| N | -1.470151 | -1.706784 | -0.565674 |
| N | 2.896878  | -1.898082 | -2.008618 |
| H | 1.369321  | 1.443888  | 0.519924  |
| H | -1.652551 | -2.611019 | -0.990298 |
| H | -2.217495 | -1.197613 | -0.092681 |
| H | 3.877832  | -1.718986 | -2.165369 |
| H | 2.560106  | -3.642835 | -3.217320 |

|   |           |           |           |
|---|-----------|-----------|-----------|
| N | -2.287124 | 1.872145  | -0.119567 |
| C | -2.033792 | 3.126344  | -0.635495 |
| N | -3.174793 | 3.879859  | -0.845970 |
| C | -4.440646 | 3.428968  | -0.558373 |
| C | -4.676923 | 2.199583  | -0.052451 |
| C | -3.529662 | 1.306766  | 0.110183  |
| O | -0.914691 | 3.534801  | -0.886482 |
| O | -3.623771 | 0.120196  | 0.423671  |
| C | -6.036586 | 1.678023  | 0.295946  |
| H | -1.464739 | 1.257754  | 0.000000  |
| H | -5.240963 | 4.128039  | -0.777892 |
| H | -6.811444 | 2.389205  | -0.001472 |
| H | -6.221039 | 0.726619  | -0.210210 |
| H | -6.119086 | 1.493953  | 1.371699  |
| H | -3.035705 | 4.737522  | -1.365308 |
| C | -0.990466 | 4.447120  | -4.316069 |
| N | -2.236930 | 4.058611  | -4.128543 |
| C | -2.439371 | 2.771668  | -3.765191 |
| C | -1.380373 | 1.852158  | -3.574522 |
| C | -0.049755 | 2.291759  | -3.812717 |
| C | 0.129486  | 3.606658  | -4.182502 |
| C | -3.812042 | 2.322379  | -3.560610 |
| C | -4.040377 | 0.997594  | -3.121537 |
| C | -2.935834 | 0.118173  | -2.883963 |
| C | -1.661912 | 0.518071  | -3.122318 |
| N | -4.822266 | 3.186623  | -3.804581 |
| C | -6.058169 | 2.755386  | -3.634540 |
| C | -6.395037 | 1.454601  | -3.208083 |
| C | -5.374175 | 0.573500  | -2.946878 |
| C | 1.108333  | 1.349468  | -3.655827 |
| H | -5.570959 | -0.446080 | -2.622143 |
| H | -6.848190 | 3.472341  | -3.852409 |
| H | -7.435743 | 1.168061  | -3.102220 |
| H | -0.850130 | 5.491065  | -4.593170 |
| H | 1.125146  | 4.000748  | -4.363736 |
| H | -0.839453 | -0.171489 | -2.966146 |
| H | -3.145227 | -0.874361 | -2.498546 |
| H | 2.044593  | 1.837708  | -3.936115 |
| H | 1.197406  | 1.027822  | -2.613555 |
| H | 0.970751  | 0.459026  | -4.281607 |

85

**(AT/5-Mephen/TA)mg (M06-2X/6-31+G(d,p))**

|   |           |           |          |
|---|-----------|-----------|----------|
| C | 1.299151  | -0.246413 | 6.449449 |
| N | 2.328951  | -1.163341 | 6.405149 |
| C | 2.216553  | -2.531628 | 6.336004 |
| N | 0.911377  | -2.984969 | 6.306069 |
| C | -0.171493 | -2.143574 | 6.379603 |
| C | -0.050364 | -0.803173 | 6.497041 |
| O | 3.181269  | -3.277929 | 6.294877 |
| C | -1.206801 | 0.138773  | 6.630813 |
| O | 1.542105  | 0.963093  | 6.444540 |
| H | 3.308220  | -0.794752 | 6.341945 |
| H | -1.138820 | -2.633086 | 6.333914 |
| H | -2.153324 | -0.385174 | 6.472409 |
| H | -1.124391 | 0.947290  | 5.899836 |
| H | -1.221821 | 0.600111  | 7.623477 |
| H | 0.796157  | -3.952932 | 6.033186 |
| N | 4.943416  | -0.244563 | 6.107113 |

|   |           |           |           |
|---|-----------|-----------|-----------|
| C | 5.901032  | -1.181697 | 5.995792  |
| N | 7.183171  | -1.000133 | 5.701647  |
| C | 7.466596  | 0.300934  | 5.535723  |
| C | 6.582143  | 1.373012  | 5.619165  |
| C | 5.235679  | 1.051868  | 5.903039  |
| N | 7.214572  | 2.571247  | 5.361906  |
| C | 8.455377  | 2.231931  | 5.135468  |
| N | 8.672939  | 0.875673  | 5.223868  |
| N | 4.257895  | 1.965545  | 5.946529  |
| H | 5.558486  | -2.202801 | 6.154976  |
| H | 4.494741  | 2.937398  | 5.822502  |
| H | 3.295096  | 1.684726  | 6.148964  |
| H | 9.544550  | 0.383833  | 5.094103  |
| H | 9.256362  | 2.919191  | 4.900838  |
| N | 0.000000  | 0.000000  | 0.000000  |
| C | -1.225403 | -0.554776 | 0.000000  |
| N | -2.391132 | 0.055294  | 0.174132  |
| C | -2.228138 | 1.368496  | 0.383056  |
| C | -1.027534 | 2.072431  | 0.430478  |
| C | 0.146844  | 1.316310  | 0.222869  |
| N | -3.190697 | 2.318382  | 0.620798  |
| C | -2.533257 | 3.515201  | 0.795759  |
| N | -1.235401 | 3.411153  | 0.691948  |
| N | 1.377551  | 1.848347  | 0.270527  |
| H | -1.238747 | -1.632322 | -0.148223 |
| H | 1.468125  | 2.847667  | 0.368461  |
| H | 2.196829  | 1.276984  | 0.053243  |
| H | -4.186526 | 2.155799  | 0.644181  |
| H | -3.070537 | 4.431544  | 0.997490  |
| N | 2.934391  | -3.880873 | 0.274965  |
| C | 1.848244  | -3.021423 | 0.216113  |
| N | 2.198475  | -1.704674 | 0.023587  |
| C | 3.467555  | -1.201912 | -0.170656 |
| C | 4.550169  | -2.186469 | -0.198037 |
| C | 4.223938  | -3.474194 | 0.048296  |
| O | 0.698444  | -3.401909 | 0.323327  |
| C | 5.944119  | -1.722870 | -0.494329 |
| O | 3.645050  | 0.010012  | -0.315295 |
| H | 1.388298  | -1.035907 | 0.000000  |
| H | 4.971302  | -4.260669 | 0.082998  |
| H | 6.634236  | -2.569844 | -0.521132 |
| H | 2.712589  | -4.842499 | 0.492486  |
| H | 5.981332  | -1.208825 | -1.459117 |
| H | 6.298655  | -1.011537 | 0.257293  |
| H | 0.003754  | 1.374263  | 3.207283  |
| C | 4.872430  | 0.054305  | 2.842834  |
| C | 3.546251  | -0.616778 | 3.077263  |
| C | 3.452243  | -2.058571 | 3.204808  |
| C | 2.189713  | -2.699694 | 3.316662  |
| C | 0.975330  | -1.892301 | 3.277560  |
| C | 1.107178  | -0.486586 | 3.213117  |
| C | 2.403073  | 0.119569  | 3.120910  |
| N | -0.224517 | -2.510064 | 3.326521  |
| C | -1.307056 | -1.757946 | 3.295611  |
| C | -1.290019 | -0.347524 | 3.256875  |
| C | -0.072176 | 0.288986  | 3.229784  |
| C | 4.597567  | -2.883427 | 3.248617  |
| C | 4.454688  | -4.240816 | 3.422026  |
| C | 3.154222  | -4.764455 | 3.548834  |

|   |           |           |          |
|---|-----------|-----------|----------|
| N | 2.059223  | -4.033756 | 3.490206 |
| H | 2.453024  | 1.204143  | 3.055477 |
| H | 5.587068  | -2.444871 | 3.158914 |
| H | -2.259558 | -2.285521 | 3.308653 |
| H | -2.223219 | 0.206900  | 3.246397 |
| H | 3.011998  | -5.830958 | 3.716586 |
| H | 5.317312  | -4.895695 | 3.487480 |
| H | 4.794804  | 1.124404  | 3.051989 |
| H | 5.162445  | -0.054136 | 1.792206 |
| H | 5.672741  | -0.357128 | 3.463155 |

88

**(AT/4,7-Me<sub>2</sub>phen/TA)mg (M06-2X/6-31+G(d,p))**

|   |           |           |           |
|---|-----------|-----------|-----------|
| C | 2.460175  | -2.967853 | -6.289555 |
| N | 2.188910  | -1.620457 | -6.228985 |
| C | 0.952293  | -1.017339 | -6.321444 |
| C | -0.168638 | -1.905284 | -6.625681 |
| C | 0.080383  | -3.233163 | -6.638170 |
| N | 1.339661  | -3.755254 | -6.472291 |
| O | 0.839032  | 0.199621  | -6.146613 |
| C | -1.520365 | -1.305256 | -6.863077 |
| O | 3.585815  | -3.425486 | -6.184201 |
| H | -0.707879 | -3.965090 | -6.780635 |
| H | -2.281472 | -2.086547 | -6.935866 |
| H | -1.792799 | -0.628503 | -6.049163 |
| H | -1.528564 | -0.718666 | -7.787254 |
| H | 1.476281  | -4.745467 | -6.316382 |
| H | 3.018637  | -1.019926 | -6.006971 |
| N | 4.446176  | -0.124039 | -5.553963 |
| C | 5.646601  | -0.722789 | -5.658967 |
| N | 6.827156  | -0.239130 | -5.294183 |
| C | 6.708674  | 0.981650  | -4.752894 |
| C | 5.536908  | 1.713251  | -4.568132 |
| C | 4.344434  | 1.107333  | -5.023944 |
| N | 5.791168  | 2.933180  | -3.976414 |
| C | 7.085933  | 2.937942  | -3.805299 |
| N | 3.141901  | 1.693056  | -4.937654 |
| N | 7.698555  | 1.789894  | -4.253202 |
| H | 5.620073  | -1.725381 | -6.080597 |
| H | 3.083821  | 2.634679  | -4.582223 |
| H | 2.318634  | 1.240716  | -5.340500 |
| H | 8.683013  | 1.568893  | -4.228226 |
| H | 7.652168  | 3.744446  | -3.360380 |
| N | 0.000000  | 0.000000  | 0.000000  |
| C | 0.714202  | 1.135540  | -0.088630 |
| C | -0.008793 | 2.344136  | -0.205149 |
| C | -1.398039 | 2.235408  | -0.177793 |
| N | -2.122935 | 1.112336  | -0.074847 |
| C | -1.344956 | 0.040055  | -0.000000 |
| N | -1.844208 | 3.528624  | -0.284405 |
| C | -0.727520 | 4.328669  | -0.367575 |
| N | 0.392661  | 3.658653  | -0.322641 |
| N | 2.053279  | 1.077401  | -0.077308 |
| H | -1.829453 | -0.932600 | 0.052812  |
| H | 2.577778  | 1.938143  | -0.096794 |
| H | 2.528867  | 0.185425  | 0.073768  |
| H | -2.810627 | 3.819316  | -0.296212 |
| H | -0.807139 | 5.402930  | -0.460336 |
| N | 0.939702  | -4.733149 | -0.627082 |

|   |           |           |           |
|---|-----------|-----------|-----------|
| C | 0.342095  | -3.502114 | -0.436367 |
| N | 1.219750  | -2.509574 | -0.065837 |
| C | 2.581625  | -2.629944 | 0.113965  |
| C | 3.121933  | -3.983917 | 0.003131  |
| C | 2.276988  | -4.955019 | -0.407338 |
| O | -0.852766 | -3.310982 | -0.589310 |
| C | 4.571514  | -4.209126 | 0.305729  |
| O | 3.268931  | -1.631236 | 0.347563  |
| H | 0.792819  | -1.554701 | -0.000000 |
| H | 2.612466  | -5.970938 | -0.588341 |
| H | 4.864233  | -5.230721 | 0.049509  |
| H | 0.366392  | -5.425650 | -1.090988 |
| H | 5.198361  | -3.515238 | -0.260314 |
| H | 4.778281  | -4.039378 | 1.367157  |
| C | 3.083609  | -2.367857 | -3.005359 |
| C | 2.120084  | -3.360113 | -3.307083 |
| N | 2.447352  | -4.655271 | -3.522660 |
| C | 3.723593  | -4.976921 | -3.452462 |
| C | 4.752588  | -4.075992 | -3.119860 |
| C | 4.444111  | -2.756673 | -2.868540 |
| C | 2.674227  | -1.003016 | -2.842710 |
| C | 1.376394  | -0.638866 | -2.993311 |
| C | 0.360560  | -1.614363 | -3.263742 |
| C | 0.713158  | -2.978853 | -3.397078 |
| C | -1.004923 | -1.245225 | -3.405463 |
| C | -1.918659 | -2.260863 | -3.586163 |
| C | -1.468221 | -3.592040 | -3.665224 |
| N | -0.202491 | -3.953951 | -3.601465 |
| C | -1.411579 | 0.201831  | -3.418646 |
| C | 5.481459  | -1.771475 | -2.406910 |
| H | -2.191517 | -4.395428 | -3.797676 |
| H | -2.978702 | -2.043313 | -3.679699 |
| H | 3.969035  | -6.017283 | -3.661099 |
| H | 5.777717  | -4.428635 | -3.052386 |
| H | 3.418076  | -0.248445 | -2.608546 |
| H | 1.098587  | 0.405479  | -2.894799 |
| H | 6.476488  | -2.221877 | -2.418307 |
| H | 5.506662  | -0.880566 | -3.041043 |
| H | 5.246347  | -1.443346 | -1.386521 |
| H | -2.498131 | 0.299249  | -3.472758 |
| H | -1.069264 | 0.727775  | -2.522925 |
| H | -0.961441 | 0.701021  | -4.285951 |

88

**(AT/5,6-Me<sub>2</sub>phen/TA)mg (M06-2X/6-31+G(d,p))**

|   |           |          |           |
|---|-----------|----------|-----------|
| N | -1.581869 | 1.990797 | -6.439359 |
| C | -2.495214 | 3.013113 | -6.334062 |
| N | -1.925594 | 4.248651 | -6.090141 |
| C | -0.568602 | 4.439801 | -5.997839 |
| C | 0.323018  | 3.435917 | -6.146073 |
| C | -0.211691 | 2.088645 | -6.327872 |
| O | -3.698761 | 2.844445 | -6.439792 |
| O | 0.491019  | 1.074707 | -6.381065 |
| C | 1.809121  | 3.612959 | -6.098182 |
| H | -1.999453 | 1.034305 | -6.547478 |
| H | -0.259041 | 5.459604 | -5.793818 |
| H | 2.068238  | 4.631993 | -5.798861 |
| H | -2.572081 | 4.972051 | -5.802688 |
| H | 2.252393  | 2.913698 | -5.384198 |

|   |           |           |           |
|---|-----------|-----------|-----------|
| H | 2.258331  | 3.407140  | -7.074939 |
| N | -2.392969 | -4.187087 | -6.288426 |
| C | -2.788142 | -2.871541 | -6.411730 |
| C | -4.175567 | -2.753001 | -6.409787 |
| N | -4.629103 | -4.042075 | -6.287553 |
| C | -3.516506 | -4.849677 | -6.220658 |
| N | -4.893510 | -1.622088 | -6.486170 |
| C | -4.108587 | -0.556518 | -6.591210 |
| N | -2.763980 | -0.525470 | -6.605421 |
| C | -2.058549 | -1.664649 | -6.495876 |
| N | -0.721320 | -1.612445 | -6.450392 |
| H | -4.586473 | 0.419159  | -6.659599 |
| H | -0.203191 | -2.472230 | -6.359967 |
| H | -0.238521 | -0.711684 | -6.473302 |
| H | -5.597026 | -4.326119 | -6.256197 |
| H | -3.601829 | -5.923039 | -6.122916 |
| H | 2.279745  | -1.309373 | -0.286156 |
| N | 2.393779  | 0.020201  | -0.146721 |
| C | 1.206184  | 0.595233  | -0.000000 |
| N | 0.000000  | 0.000000  | 0.000000  |
| C | -0.099390 | -1.329517 | -0.172808 |
| C | 1.104771  | -2.056169 | -0.306814 |
| N | 1.361527  | -3.397527 | -0.498801 |
| C | 2.663263  | -3.461036 | -0.585038 |
| N | 3.276764  | -2.234747 | -0.465246 |
| N | -1.309359 | -1.900142 | -0.231302 |
| H | 1.179349  | 1.676789  | 0.120274  |
| H | -1.371737 | -2.896835 | -0.367632 |
| H | -2.153954 | -1.327639 | -0.169489 |
| H | 4.265813  | -2.036809 | -0.499325 |
| H | 3.234290  | -4.366968 | -0.733939 |
| N | -2.214759 | 1.689294  | -0.072642 |
| C | -1.879810 | 3.021777  | -0.126411 |
| N | -2.959598 | 3.861780  | -0.323902 |
| C | -4.251756 | 3.406349  | -0.420688 |
| C | -4.575457 | 2.098525  | -0.322744 |
| C | -3.475675 | 1.145860  | -0.193001 |
| O | -0.733920 | 3.425577  | -0.016565 |
| O | -3.628202 | -0.079461 | -0.189831 |
| C | -5.975038 | 1.568875  | -0.376218 |
| H | -1.400982 | 1.031209  | -0.000000 |
| H | -5.000541 | 4.174340  | -0.584788 |
| H | -6.679928 | 2.362480  | -0.637923 |
| H | -6.051485 | 0.771402  | -1.120109 |
| H | -6.267497 | 1.141412  | 0.588142  |
| H | -2.724991 | 4.813444  | -0.575252 |
| C | -4.589967 | 1.072239  | -3.612531 |
| C | -3.219753 | 1.355872  | -3.412543 |
| C | -2.860151 | 2.722071  | -3.339407 |
| N | -3.748625 | 3.731141  | -3.465072 |
| C | -5.013672 | 3.422728  | -3.676241 |
| C | -5.490006 | 2.103644  | -3.755064 |
| C | -1.460511 | 3.063464  | -3.126059 |
| C | -0.504907 | 2.020525  | -3.106784 |
| C | -0.894343 | 0.625303  | -3.249919 |
| C | -2.223864 | 0.298192  | -3.322826 |
| N | -1.143132 | 4.363940  | -2.948396 |
| C | 0.122229  | 4.671998  | -2.738177 |
| C | 1.159155  | 3.724908  | -2.711514 |



|   |           |           |           |
|---|-----------|-----------|-----------|
| C | 0.841755  | 2.400021  | -2.906217 |
| H | 1.625705  | 1.650422  | -2.889702 |
| H | -5.700353 | 4.258830  | -3.798164 |
| H | -6.542838 | 1.910797  | -3.932063 |
| H | 0.341507  | 5.725712  | -2.573732 |
| H | 2.182576  | 4.037706  | -2.533339 |
| C | 0.227023  | -0.380072 | -3.336403 |
| C | -2.747576 | -1.116134 | -3.289620 |
| H | -4.934359 | 0.045185  | -3.669960 |
| H | -0.127731 | -1.407577 | -3.386223 |
| H | 0.812509  | -0.179863 | -4.241961 |
| H | 0.906631  | -0.302966 | -2.483495 |
| H | -3.381354 | -1.334070 | -4.153580 |
| H | -1.954698 | -1.860846 | -3.262548 |
| H | -3.362012 | -1.244616 | -2.390312 |

94

**(AT/3,4,7,8-Me<sub>4</sub>phen/TA)mg (M06-2X/6-31+G(d,p))**

|   |           |           |           |
|---|-----------|-----------|-----------|
| N | -2.707020 | 0.225913  | 6.371767  |
| C | -2.787695 | -1.135252 | 6.558683  |
| N | -1.554210 | -1.766209 | 6.581919  |
| C | -0.363949 | -1.092303 | 6.467798  |
| C | -0.297805 | 0.248066  | 6.318908  |
| C | -1.562445 | 0.981952  | 6.252118  |
| O | -3.837201 | -1.732486 | 6.701056  |
| O | -1.628116 | 2.204271  | 6.104757  |
| C | 0.974512  | 1.026487  | 6.187241  |
| H | -3.638245 | 0.712609  | 6.306978  |
| H | 0.525641  | -1.715112 | 6.500971  |
| H | 1.846055  | 0.376104  | 6.300002  |
| H | -1.585510 | -2.774416 | 6.639245  |
| H | 1.025815  | 1.518614  | 5.209750  |
| H | 1.023466  | 1.815759  | 6.942610  |
| N | -7.122036 | 4.443841  | 5.273853  |
| C | -6.633425 | 3.204557  | 5.635134  |
| C | -7.664750 | 2.295727  | 5.861245  |
| N | -8.811155 | 3.017314  | 5.640914  |
| C | -8.419629 | 4.289429  | 5.289664  |
| N | -7.549908 | 1.001579  | 6.185347  |
| C | -6.276186 | 0.643677  | 6.305007  |
| N | -5.190062 | 1.421185  | 6.152023  |
| C | -5.321276 | 2.713330  | 5.808796  |
| N | -4.226681 | 3.469211  | 5.634217  |
| H | -6.062423 | -0.395067 | 6.548666  |
| H | -4.345844 | 4.456688  | 5.469135  |
| H | -3.294994 | 3.086119  | 5.815204  |
| H | -9.753364 | 2.662773  | 5.712973  |
| H | -9.141413 | 5.061024  | 5.060070  |
| C | 2.592812  | 0.464268  | 0.220818  |
| N | 2.249446  | -0.825559 | 0.095393  |
| C | 0.933673  | -0.966949 | -0.000000 |
| N | 0.000000  | 0.000000  | 0.000000  |
| C | 0.359901  | 1.291249  | 0.108649  |
| C | 1.739208  | 1.565724  | 0.248391  |
| N | 2.441038  | 2.745206  | 0.386606  |
| C | 3.689312  | 2.365981  | 0.443578  |
| N | 3.848742  | 1.001940  | 0.349344  |
| N | -0.582242 | 2.243566  | 0.094054  |

|   |           |           |           |
|---|-----------|-----------|-----------|
| H | 0.539937  | -1.979215 | -0.071989 |
| H | -0.295749 | 3.209725  | 0.118649  |
| H | -1.559230 | 1.995890  | -0.079761 |
| H | 4.714029  | 0.482653  | 0.361197  |
| H | 4.537001  | 3.028126  | 0.553125  |
| N | -2.680551 | -0.787752 | 0.059331  |
| C | -2.853584 | -2.097283 | 0.444691  |
| N | -4.175417 | -2.456639 | 0.624118  |
| C | -5.220191 | -1.602830 | 0.370329  |
| C | -5.040150 | -0.336359 | -0.064417 |
| C | -3.666552 | 0.151815  | -0.153050 |
| O | -1.923652 | -2.868047 | 0.616758  |
| O | -3.367238 | 1.324468  | -0.399085 |
| C | -6.155622 | 0.599309  | -0.413066 |
| H | -1.683650 | -0.474179 | -0.000000 |
| H | -6.207633 | -2.017621 | 0.544256  |
| H | -7.121572 | 0.168988  | -0.134044 |
| H | -6.030346 | 1.554974  | 0.103810  |
| H | -6.164196 | 0.813280  | -1.486715 |
| H | -4.325730 | -3.328646 | 1.115399  |
| C | -4.997983 | 2.963334  | 2.286196  |
| C | -5.110833 | 1.538925  | 2.761254  |
| C | -3.930338 | 0.775653  | 2.990862  |
| C | -4.049941 | -0.598752 | 3.303227  |
| N | -5.249899 | -1.197317 | 3.462786  |
| C | -6.324187 | -0.452424 | 3.312459  |
| C | -6.334999 | 0.913343  | 2.941984  |
| C | -2.846375 | -1.420649 | 3.409836  |
| C | -1.570926 | -0.819130 | 3.256741  |
| C | -1.499946 | 0.596381  | 3.014778  |
| C | -2.620331 | 1.350975  | 2.875288  |
| N | -3.003022 | -2.746537 | 3.610579  |
| C | -1.916424 | -3.484347 | 3.671375  |
| C | -0.595591 | -3.002222 | 3.546737  |
| C | -0.414980 | -1.644484 | 3.330386  |
| C | 0.980118  | -1.088148 | 3.210502  |
| H | -7.279561 | -0.952140 | 3.481274  |
| C | -7.661084 | 1.598553  | 2.728708  |
| H | -2.071653 | -4.554049 | 3.818950  |
| C | 0.558293  | -3.966095 | 3.617249  |
| H | -0.533680 | 1.081604  | 2.930414  |
| H | -2.522297 | 2.412544  | 2.675184  |
| H | 1.632106  | -1.777203 | 2.669058  |
| H | 1.012519  | -0.131621 | 2.686435  |
| H | 1.415706  | -0.932702 | 4.205834  |
| H | -5.976535 | 3.409788  | 2.106633  |
| H | -4.477524 | 3.581771  | 3.024217  |
| H | -4.427225 | 2.995032  | 1.350346  |
| H | 1.307141  | -3.655866 | 4.354890  |
| H | 0.210496  | -4.966585 | 3.885489  |
| H | 1.067689  | -4.038697 | 2.649666  |
| H | -8.463022 | 1.015287  | 3.190741  |
| H | -7.679275 | 2.601423  | 3.164633  |
| H | -7.889926 | 1.702993  | 1.661640  |

|   |           |           |           |
|---|-----------|-----------|-----------|
| C | -3.061042 | -1.830308 | 0.300914  |
| N | -2.732801 | -0.530220 | 0.015202  |
| C | -3.610744 | 0.530027  | -0.115059 |
| C | -5.038408 | 0.200787  | -0.041947 |
| C | -5.371700 | -1.083623 | 0.194562  |
| N | -4.424726 | -2.067730 | 0.364896  |
| O | -3.193324 | 1.672555  | -0.281165 |
| C | -6.022810 | 1.318079  | -0.194121 |
| O | -2.239974 | -2.714910 | 0.484151  |
| N | 0.000000  | 0.000000  | 0.000000  |
| C | 0.513264  | 1.244962  | 0.067421  |
| C | 1.922981  | 1.358038  | 0.105889  |
| C | 2.638990  | 0.165211  | 0.090606  |
| N | 2.142758  | -1.080978 | 0.047357  |
| C | 0.817069  | -1.068222 | -0.000000 |
| N | 3.954248  | 0.552219  | 0.137429  |
| C | 3.960729  | 1.929156  | 0.174639  |
| N | 2.764027  | 2.450454  | 0.157841  |
| N | -0.302439 | 2.301462  | 0.086841  |
| N | 0.705643  | 2.151027  | 3.221773  |
| C | 0.250752  | 0.878665  | 3.171006  |
| C | 1.115729  | -0.240431 | 3.214719  |
| C | 2.502199  | 0.003613  | 3.301758  |
| C | 2.955467  | 1.299417  | 3.368742  |
| C | 2.005780  | 2.341104  | 3.325472  |
| C | 0.585733  | -1.576177 | 3.185464  |
| C | -0.753217 | -1.790009 | 3.186931  |
| C | -1.667640 | -0.682042 | 3.176647  |
| C | -1.186721 | 0.647097  | 3.084398  |
| N | -2.009996 | 1.706289  | 2.928437  |
| C | -3.310737 | 1.486026  | 2.938131  |
| C | -3.895419 | 0.217917  | 3.141612  |
| C | -3.062494 | -0.872685 | 3.250296  |
| C | -3.517287 | 3.265544  | 5.611528  |
| C | -2.357121 | 2.493371  | 5.853932  |
| N | -2.541958 | 1.212496  | 6.228360  |
| C | -3.786697 | 0.717004  | 6.350146  |
| N | -4.937869 | 1.345453  | 6.154773  |
| C | -4.737574 | 2.619647  | 5.784589  |

|   |           |           |           |
|---|-----------|-----------|-----------|
| N | -5.677432 | 3.566896  | 5.462942  |
| C | -4.986688 | 4.708477  | 5.119471  |
| N | -3.690968 | 4.568291  | 5.194180  |
| N | -1.118347 | 2.980803  | 5.732837  |
| N | -0.463171 | -0.639316 | 6.289696  |
| C | 0.836767  | -0.174364 | 6.373331  |
| C | 1.880621  | -1.197094 | 6.504444  |
| C | 1.494745  | -2.488922 | 6.474068  |
| N | 0.176620  | -2.860766 | 6.341674  |
| C | -0.862585 | -1.950393 | 6.242992  |
| C | 3.294909  | -0.738488 | 6.680605  |
| O | 1.073996  | 1.030073  | 6.339706  |
| O | -2.025946 | -2.302046 | 6.127061  |
| H | 0.307950  | -2.029573 | -0.027483 |
| H | 0.082201  | 3.198034  | 0.343347  |
| H | -1.312559 | 2.167064  | 0.112498  |
| H | 4.751325  | -0.066119 | 0.126289  |
| H | 4.884788  | 2.489755  | 0.209401  |
| H | -1.699413 | -0.313102 | -0.000000 |
| H | -6.403397 | -1.410604 | 0.276218  |
| H | -7.048779 | 0.947779  | -0.130179 |
| H | -5.867467 | 2.070291  | 0.585917  |
| H | -5.886475 | 1.825686  | -1.153020 |
| H | -4.687979 | -3.023263 | 0.558013  |
| H | -3.833750 | -0.334949 | 6.623987  |
| H | -0.996658 | 3.816040  | 5.178626  |
| H | -0.323218 | 2.349400  | 5.825691  |
| H | -6.677840 | 3.439962  | 5.494908  |
| H | -5.500102 | 5.613105  | 4.824286  |
| H | -1.238117 | 0.076469  | 6.249494  |
| H | 2.203206  | -3.307136 | 6.556567  |
| H | 3.983913  | -1.586888 | 6.687987  |
| H | -0.094891 | -3.832365 | 6.301738  |
| H | 3.187445  | -0.841676 | 3.321024  |
| H | -3.450723 | -1.877673 | 3.395828  |
| H | 2.339667  | 3.375885  | 3.365814  |
| H | 4.012727  | 1.532031  | 3.447663  |
| H | -3.943989 | 2.359991  | 2.787807  |
| H | -4.974312 | 0.121593  | 3.207529  |

|   |           |           |          |
|---|-----------|-----------|----------|
| H | -1.165789 | -2.794799 | 3.181567 |
| H | 1.287115  | -2.407037 | 3.172991 |
| H | 3.574550  | -0.052599 | 5.876158 |
| H | 3.405577  | -0.186726 | 7.619085 |

85

**(AT/4-Mephen/TA)MG (M06-2X/6-31+G(d,p))**

|   |           |           |           |
|---|-----------|-----------|-----------|
| N | -3.211581 | 2.778926  | 6.174430  |
| C | -2.356389 | 1.699989  | 6.259869  |
| C | -3.056429 | 0.506284  | 6.403896  |
| N | -4.377027 | 0.878027  | 6.398620  |
| C | -4.401238 | 2.248710  | 6.261052  |
| N | -2.545628 | -0.729542 | 6.513534  |
| C | -1.219298 | -0.705690 | 6.481775  |
| N | -0.417357 | 0.365629  | 6.352328  |
| C | -0.946306 | 1.598772  | 6.219902  |
| N | -0.143546 | 2.655160  | 6.072251  |
| N | 2.305658  | -0.139640 | 6.336490  |
| C | 3.181947  | 0.929024  | 6.321895  |
| C | 4.610235  | 0.595466  | 6.271835  |
| C | 4.943589  | -0.707958 | 6.191269  |
| N | 3.996710  | -1.706546 | 6.149690  |
| C | 2.632626  | -1.464128 | 6.205916  |
| O | 2.764633  | 2.083186  | 6.351609  |
| O | 1.812276  | -2.365524 | 6.142602  |
| C | 5.593568  | 1.724125  | 6.281101  |
| C | 1.033079  | -0.707258 | 3.216772  |
| C | 0.090603  | -1.785310 | 3.285922  |
| C | -1.243632 | -1.539860 | 3.297239  |
| C | -1.750748 | -0.197170 | 3.219595  |
| C | -0.852606 | 0.894239  | 3.115745  |
| C | 0.583838  | 0.633973  | 3.164331  |
| N | 1.438455  | 1.682532  | 3.152874  |
| C | 2.732742  | 1.430726  | 3.157623  |
| C | 3.285466  | 0.131629  | 3.157140  |
| C | 2.424686  | -0.940186 | 3.186864  |
| C | -3.146005 | 0.078083  | 3.264441  |
| C | -3.538287 | 1.393970  | 3.135780  |
| C | -2.564103 | 2.400742  | 2.984854  |
| N | -1.266278 | 2.175366  | 2.986143  |
| C | -4.148129 | -1.025242 | 3.469429  |
| H | 2.786634  | -1.966235 | 3.193103  |
| N | 0.000000  | 0.000000  | 0.000000  |
| C | 0.970591  | 0.935563  | 0.003495  |
| C | 2.306775  | 0.473840  | -0.021710 |
| C | 2.482811  | -0.906221 | -0.023989 |
| N | 1.528997  | -1.848920 | -0.007330 |
| C | 0.318164  | -1.306920 | 0.000000  |
| N | 3.843973  | -1.079280 | -0.038318 |
| C | 4.403177  | 0.179444  | -0.048587 |
| N | 3.516335  | 1.137397  | -0.037964 |
| N | 0.648342  | 2.231139  | 0.016048  |
| N | -2.693981 | 0.627717  | 0.003011  |
| C | -3.080898 | 1.950038  | -0.107107 |
| C | -4.524324 | 2.210312  | -0.050154 |
| C | -5.341134 | 1.156551  | 0.146356  |

|   |           |           |           |
|---|-----------|-----------|-----------|
| N | -4.861522 | -0.125631 | 0.293086  |
| C | -3.514259 | -0.444050 | 0.237041  |
| O | -2.246303 | 2.839460  | -0.244829 |
| O | -3.113808 | -1.588476 | 0.386163  |
| C | -4.985890 | 3.627817  | -0.186493 |
| H | -0.534547 | -1.982335 | 0.021036  |
| H | 1.376491  | 2.903145  | 0.203441  |
| H | -0.327199 | 2.518039  | 0.089464  |
| H | 4.324113  | -1.966240 | -0.063061 |
| H | 5.474947  | 0.322171  | -0.068957 |
| H | -1.657169 | 0.412163  | 0.000000  |
| H | -6.419755 | 1.260959  | 0.208734  |
| H | -6.075250 | 3.692307  | -0.131753 |
| H | -4.552905 | 4.248030  | 0.604346  |
| H | -4.652076 | 4.051984  | -1.137535 |
| H | -5.484389 | -0.906284 | 0.442269  |
| H | -0.698353 | -1.658286 | 6.554048  |
| H | -0.552203 | 3.529056  | 5.778013  |
| H | 0.864757  | 2.525256  | 5.999082  |
| H | -5.165054 | 0.255945  | 6.499446  |
| H | -5.332361 | 2.798065  | 6.236312  |
| H | 1.269689  | 0.075228  | 6.339442  |
| H | 5.975410  | -1.041533 | 6.143384  |
| H | 6.619810  | 1.350329  | 6.249748  |
| H | 4.259588  | -2.679442 | 6.087516  |
| H | 3.391039  | 2.297527  | 3.154479  |
| H | 4.363174  | 0.001425  | 3.133504  |
| H | -2.873283 | 3.438432  | 2.870619  |
| H | -4.590931 | 1.665295  | 3.159822  |
| H | -1.946207 | -2.363893 | 3.357121  |
| H | 0.472769  | -2.800432 | 3.341078  |
| H | 5.428465  | 2.380878  | 5.421237  |
| H | 5.466425  | 2.339211  | 7.176223  |
| H | -4.071810 | -1.774774 | 2.674168  |
| H | -3.966767 | -1.528158 | 4.426697  |
| H | -5.163394 | -0.617520 | 3.473219  |

85

**(AT/5-Mephen/TA)MG (M06-2X/6-31+G(d,p))**

|   |           |           |          |
|---|-----------|-----------|----------|
| N | -3.224075 | 2.674205  | 6.198370 |
| C | -2.360523 | 1.599796  | 6.256561 |
| C | -3.050816 | 0.398145  | 6.377669 |
| N | -4.373815 | 0.760486  | 6.389344 |
| C | -4.409223 | 2.133418  | 6.281288 |
| N | -2.529560 | -0.835883 | 6.455636 |
| C | -1.203514 | -0.800022 | 6.422112 |
| N | -0.409809 | 0.280563  | 6.316708 |
| C | -0.949637 | 1.511414  | 6.212654 |
| N | -0.157048 | 2.578202  | 6.086820 |
| N | 2.322208  | -0.194997 | 6.319399 |
| C | 3.184616  | 0.884998  | 6.317871 |
| C | 4.617119  | 0.570368  | 6.266680 |
| C | 4.967448  | -0.727530 | 6.171353 |
| N | 4.033505  | -1.737718 | 6.116740 |
| C | 2.666302  | -1.513232 | 6.169859 |
| C | 5.585399  | 1.711697  | 6.287407 |
| O | 2.752462  | 2.033284  | 6.360518 |
| O | 1.857597  | -2.423697 | 6.089722 |
| C | -2.562643 | 2.368035  | 2.981609 |

|   |           |           |           |
|---|-----------|-----------|-----------|
| C | -3.515056 | 1.337244  | 3.102804  |
| C | -3.064536 | 0.040497  | 3.207152  |
| C | -1.677274 | -0.221315 | 3.189732  |
| C | -0.808146 | 0.896546  | 3.101821  |
| N | -1.259508 | 2.164865  | 2.985798  |
| C | 0.634349  | 0.677660  | 3.147951  |
| C | 1.107694  | -0.653604 | 3.193419  |
| C | 0.190496  | -1.753096 | 3.267431  |
| C | -1.156642 | -1.570248 | 3.279719  |
| C | 2.503649  | -0.856990 | 3.158498  |
| C | 3.341844  | 0.233522  | 3.128385  |
| C | 2.763491  | 1.520923  | 3.133569  |
| N | 1.463577  | 1.744872  | 3.134878  |
| H | 0.606250  | -2.755576 | 3.334098  |
| C | -2.104245 | -2.731308 | 3.394992  |
| N | 0.599019  | 2.245047  | 0.005745  |
| C | 0.949774  | 0.956898  | -0.008410 |
| N | 0.000000  | 0.000000  | 0.000000  |
| C | 0.348427  | -1.299381 | -0.000000 |
| N | 1.570877  | -1.813849 | -0.018914 |
| C | 2.503076  | -0.849990 | -0.048202 |
| C | 2.295733  | 0.525660  | -0.047008 |
| N | 3.867421  | -0.992218 | -0.079019 |
| C | 4.397741  | 0.278943  | -0.099797 |
| N | 3.489631  | 1.216483  | -0.080720 |
| N | -2.713060 | 0.559870  | -0.010259 |
| C | -3.125320 | 1.874785  | -0.122258 |
| C | -4.574428 | 2.105739  | -0.088773 |
| C | -5.372717 | 1.035188  | 0.092146  |
| N | -4.869203 | -0.236861 | 0.248583  |
| C | -3.514882 | -0.527588 | 0.212629  |
| O | -2.307140 | 2.781458  | -0.243160 |
| O | -3.093813 | -1.663340 | 0.370116  |
| C | -5.062101 | 3.513814  | -0.232217 |
| H | -3.764323 | -0.785389 | 3.299196  |
| H | 2.887740  | -1.875110 | 3.159637  |
| H | -0.488287 | -1.994497 | 0.030502  |
| H | 1.313552  | 2.933385  | 0.186211  |
| H | -0.382076 | 2.509512  | 0.085916  |
| H | 4.367276  | -1.868112 | -0.106373 |
| H | 5.465647  | 0.445846  | -0.133894 |
| H | -1.671573 | 0.367514  | -0.000000 |
| H | -6.454202 | 1.117198  | 0.134580  |
| H | -6.153421 | 3.555891  | -0.199238 |
| H | -4.657994 | 4.141304  | 0.568134  |
| H | -4.717965 | 3.946347  | -1.175748 |
| H | -5.477679 | -1.031872 | 0.379599  |
| H | -0.674452 | -1.750038 | 6.472036  |
| H | -0.574414 | 3.457013  | 5.821032  |
| H | 0.852957  | 2.461010  | 6.014818  |
| H | -5.156041 | 0.130468  | 6.484225  |
| H | -5.344350 | 2.676435  | 6.274824  |
| H | 1.284156  | 0.006792  | 6.315309  |
| H | 6.003509  | -1.047236 | 6.120863  |
| H | 6.616533  | 1.351908  | 6.252674  |
| H | 4.308827  | -2.706121 | 6.040059  |
| H | 3.403512  | 2.401118  | 3.128253  |
| H | 4.421913  | 0.125175  | 3.099907  |
| H | -2.888423 | 3.401909  | 2.882929  |

|   |           |           |          |
|---|-----------|-----------|----------|
| H | -4.574702 | 1.574835  | 3.113157 |
| H | 5.411196  | 2.374045  | 5.433558 |
| H | 5.449974  | 2.316698  | 7.188166 |
| H | -1.546356 | -3.668143 | 3.452999 |
| H | -2.714425 | -2.640484 | 4.301615 |
| H | -2.767041 | -2.775244 | 2.524147 |

88

**(AT/4,7-Me<sub>2</sub>phen/TA)MG (M06-2X/6-31+G(d,p))**

|   |           |           |           |
|---|-----------|-----------|-----------|
| C | -0.655166 | 0.537529  | -6.417594 |
| N | 0.136267  | -0.594916 | -6.365006 |
| C | -0.300399 | -1.891026 | -6.275004 |
| N | -1.677986 | -2.028050 | -6.314821 |
| C | -2.541254 | -0.960270 | -6.405859 |
| C | -2.104280 | 0.313477  | -6.462164 |
| O | 0.443673  | -2.854143 | -6.170117 |
| C | -2.996124 | 1.513779  | -6.530595 |
| O | -0.150022 | 1.656393  | -6.423941 |
| H | 1.181758  | -0.460975 | -6.298097 |
| H | -3.596435 | -1.214199 | -6.419681 |
| H | -4.047787 | 1.218826  | -6.561189 |
| H | -2.832929 | 2.159649  | -5.662124 |
| H | -2.769030 | 2.113628  | -7.416288 |
| H | -2.020391 | -2.976115 | -6.253748 |
| N | 2.893544  | -0.290884 | -6.163401 |
| C | 3.481508  | 0.897519  | -5.915728 |
| C | 4.888782  | 0.900391  | -5.772565 |
| C | 5.522552  | -0.333744 | -5.875452 |
| N | 4.949738  | -1.526969 | -6.097620 |
| C | 3.634255  | -1.410084 | -6.232872 |
| N | 5.793711  | 1.913846  | -5.534367 |
| C | 6.947776  | 1.305478  | -5.490903 |
| N | 6.852839  | -0.055043 | -5.687206 |
| N | 2.738641  | 2.002573  | -5.827512 |
| H | 3.066146  | -2.321752 | -6.406421 |
| H | 3.164519  | 2.834114  | -5.447287 |
| H | 1.721827  | 1.940834  | -5.874056 |
| H | 7.606577  | -0.725257 | -5.715422 |
| H | 7.901391  | 1.787472  | -5.324567 |
| N | 0.000000  | 0.000000  | 0.000000  |
| C | 0.134277  | 1.324383  | -0.206220 |
| C | -1.054096 | 2.064284  | -0.412592 |
| C | -2.244838 | 1.344897  | -0.381477 |
| N | -2.394034 | 0.027286  | -0.175619 |
| C | -1.221021 | -0.564938 | 0.000000  |
| N | -3.218053 | 2.278596  | -0.637336 |
| C | -2.574272 | 3.484875  | -0.805616 |
| N | -1.277630 | 3.398299  | -0.680276 |
| N | 1.349250  | 1.881679  | -0.204006 |
| H | -1.223733 | -1.643446 | 0.146517  |
| H | 1.450763  | 2.783302  | -0.647384 |
| H | 2.172958  | 1.283293  | -0.151244 |
| H | -4.210749 | 2.101595  | -0.671866 |
| H | -3.121059 | 4.393379  | -1.017204 |
| C | 3.431020  | -1.234310 | 0.219115  |
| N | 2.160709  | -1.744705 | 0.018359  |
| C | 1.828496  | -3.059615 | -0.169014 |



|   |           |           |           |
|---|-----------|-----------|-----------|
| N | 2.902728  | -3.929965 | -0.114946 |
| C | 4.194225  | -3.517384 | 0.123008  |
| C | 4.515623  | -2.220148 | 0.301959  |
| O | 0.686701  | -3.450821 | -0.363299 |
| O | 3.609694  | -0.024972 | 0.325708  |
| C | 5.897840  | -1.722154 | 0.589029  |
| H | 1.353848  | -1.061922 | 0.000000  |
| H | 4.936232  | -4.309057 | 0.161636  |
| H | 6.620116  | -2.542751 | 0.580059  |
| H | 2.677830  | -4.904341 | -0.254008 |
| H | 6.193193  | -0.973669 | -0.152602 |
| H | 5.932689  | -1.230900 | 1.565979  |
| C | 3.248695  | -2.340815 | -3.146042 |
| C | 3.816611  | -1.037636 | -2.937873 |
| C | 2.969889  | 0.095514  | -2.893573 |
| C | 1.535303  | -0.082576 | -3.095492 |
| C | 1.008148  | -1.395292 | -3.171673 |
| C | 1.904280  | -2.515161 | -3.230250 |
| C | -0.404470 | -1.557317 | -3.199833 |
| C | -1.170323 | -0.410404 | -3.254661 |
| C | -0.538319 | 0.848113  | -3.291538 |
| N | 0.764246  | 1.022997  | -3.194246 |
| C | 5.215177  | -0.843243 | -2.766328 |
| C | 5.652712  | 0.437433  | -2.507950 |
| C | 4.722387  | 1.493556  | -2.458492 |
| N | 3.429670  | 1.346421  | -2.658215 |
| C | -1.032470 | -2.922327 | -3.148314 |
| C | 6.178232  | -1.993022 | -2.878641 |
| H | 5.069725  | 2.505928  | -2.261603 |
| H | 6.709308  | 0.644202  | -2.357869 |
| H | -1.136942 | 1.753756  | -3.392112 |
| H | -2.255439 | -0.468557 | -3.267375 |
| H | 1.490982  | -3.509620 | -3.362253 |
| H | 3.910733  | -3.197882 | -3.223969 |
| H | 7.204675  | -1.648395 | -2.727398 |
| H | 5.963463  | -2.763774 | -2.129569 |
| H | 6.101195  | -2.458474 | -3.868542 |
| H | -0.698875 | -3.537232 | -3.991835 |
| H | -0.742594 | -3.430063 | -2.222460 |
| H | -2.122045 | -2.839204 | -3.177577 |

88

**(AT/5,6-Me<sub>2</sub>phen/TA)MG (M06-2X/6-31+G(d,p))**

|   |           |           |           |
|---|-----------|-----------|-----------|
| C | -0.760436 | 0.244187  | -6.375602 |
| N | 0.057748  | -0.870882 | -6.361996 |
| C | -0.348174 | -2.178110 | -6.321622 |
| N | -1.722170 | -2.347292 | -6.343803 |
| C | -2.611167 | -1.297479 | -6.390312 |
| C | -2.204539 | -0.012693 | -6.408502 |
| O | 0.420518  | -3.126728 | -6.273701 |
| C | -3.124664 | 1.167955  | -6.431478 |
| O | -0.281541 | 1.373849  | -6.357150 |
| H | 1.100832  | -0.716458 | -6.299419 |
| H | -3.660253 | -1.575403 | -6.401963 |
| H | -4.169514 | 0.849467  | -6.457569 |
| H | -2.965382 | 1.792742  | -5.547021 |
| H | -2.922746 | 1.797605  | -7.302471 |
| H | -2.040007 | -3.305544 | -6.327545 |

|   |           |           |           |
|---|-----------|-----------|-----------|
| N | 2.813051  | -0.516787 | -6.175803 |
| C | 3.380459  | 0.686056  | -5.951745 |
| C | 4.790966  | 0.723150  | -5.851923 |
| C | 5.451926  | -0.494501 | -5.974348 |
| N | 4.900803  | -1.701669 | -6.176021 |
| C | 3.579117  | -1.617762 | -6.266837 |
| N | 5.677367  | 1.759917  | -5.645377 |
| C | 6.847342  | 1.181021  | -5.641682 |
| N | 6.780128  | -0.181350 | -5.834168 |
| N | 2.616162  | 1.774867  | -5.845755 |
| H | 3.028315  | -2.543744 | -6.422758 |
| H | 3.037061  | 2.618684  | -5.487790 |
| H | 1.600086  | 1.690581  | -5.852671 |
| H | 7.548685  | -0.832947 | -5.884647 |
| H | 7.793532  | 1.687283  | -5.508520 |
| N | 0.000000  | 0.000000  | 0.000000  |
| C | 0.224851  | 1.299902  | -0.272649 |
| C | -0.906993 | 2.105551  | -0.537497 |
| C | -2.143369 | 1.468567  | -0.494083 |
| N | -2.382885 | 0.174955  | -0.230227 |
| C | -1.255210 | -0.483900 | 0.000000  |
| N | -3.048252 | 2.450336  | -0.812525 |
| C | -2.322719 | 3.601915  | -1.027533 |
| N | -1.037063 | 3.436521  | -0.874246 |
| N | 1.474955  | 1.774891  | -0.275580 |
| H | -1.331967 | -1.551517 | 0.194553  |
| H | 1.640932  | 2.637599  | -0.773693 |
| H | 2.253461  | 1.121766  | -0.192603 |
| H | -4.049730 | 2.337099  | -0.858254 |
| H | -2.804545 | 4.532751  | -1.293045 |
| C | 3.946758  | -3.792390 | 0.075024  |
| C | 4.363343  | -2.520810 | 0.241424  |
| C | 3.351977  | -1.460097 | 0.173355  |
| N | 2.044874  | -1.878501 | 0.000914  |
| C | 1.614774  | -3.167669 | -0.172411 |
| N | 2.626720  | -4.112510 | -0.143395 |
| O | 0.443711  | -3.475551 | -0.337058 |
| O | 3.618962  | -0.265478 | 0.268402  |
| C | 5.783017  | -2.124258 | 0.503420  |
| H | 1.285642  | -1.143317 | 0.000000  |
| H | 4.631122  | -4.634734 | 0.102068  |
| H | 6.449499  | -2.988385 | 0.437458  |
| H | 2.331286  | -5.069051 | -0.275371 |
| H | 6.102609  | -1.365404 | -0.216050 |
| H | 5.881659  | -1.678850 | 1.498148  |
| N | 3.382755  | 1.101491  | -2.725810 |
| C | 2.973207  | -0.168441 | -2.937620 |
| C | 3.857939  | -1.270111 | -2.979530 |
| C | 5.231798  | -0.986410 | -2.806635 |
| C | 5.642318  | 0.305966  | -2.573770 |
| C | 4.669204  | 1.320544  | -2.541102 |
| C | 3.374473  | -2.626664 | -3.182142 |
| C | 2.026770  | -2.869382 | -3.234932 |
| C | 1.094577  | -1.753485 | -3.177064 |
| C | 1.548911  | -0.414026 | -3.117576 |
| C | -0.304239 | -1.946305 | -3.192653 |
| C | -1.145486 | -0.855550 | -3.232753 |
| C | -0.573495 | 0.428448  | -3.283309 |
| N | 0.724933  | 0.650330  | -3.210886 |

|   |           |           |           |
|---|-----------|-----------|-----------|
| H | -0.715472 | -2.949401 | -3.171821 |
| H | 5.962794  | -1.787469 | -2.849053 |
| H | 4.965475  | 2.353271  | -2.368849 |
| H | 6.689467  | 0.549516  | -2.423684 |
| H | -1.206254 | 1.310701  | -3.379693 |
| H | -2.224556 | -0.972226 | -3.229022 |
| C | 1.426557  | -4.246509 | -3.376345 |
| C | 4.425898  | -3.696069 | -3.347680 |
| H | 4.001511  | -4.679508 | -3.534973 |
| H | 5.067831  | -3.447764 | -4.201107 |
| H | 5.063134  | -3.768455 | -2.458202 |
| H | 2.175685  | -5.035124 | -3.346808 |
| H | 0.718353  | -4.431751 | -2.561434 |
| H | 0.890795  | -4.323935 | -4.328327 |

94

**(AT/3,4,7,8-Me<sub>4</sub>phen/TA)MG (M06-2X/6-31+G(d,p))**

|   |           |           |           |
|---|-----------|-----------|-----------|
| N | -0.401592 | -0.819439 | 6.340723  |
| C | 0.903285  | -0.364322 | 6.397240  |
| C | 1.939832  | -1.397068 | 6.512682  |
| C | 1.543709  | -2.685686 | 6.491524  |
| N | 0.219846  | -3.045963 | 6.386028  |
| C | -0.811484 | -2.125577 | 6.319081  |
| O | 1.149665  | 0.837318  | 6.359181  |
| O | -1.982596 | -2.469707 | 6.254045  |
| C | 3.360766  | -0.949466 | 6.650578  |
| H | 2.247016  | -3.509862 | 6.561312  |
| H | 4.043532  | -1.803090 | 6.666802  |
| H | -0.063103 | -4.014900 | 6.367348  |
| H | -1.170186 | -0.093632 | 6.320128  |
| H | 3.627878  | -0.291925 | 5.818285  |
| H | 3.494698  | -0.370033 | 7.568905  |
| N | -3.659945 | 4.321105  | 5.131293  |
| C | -3.460991 | 3.051473  | 5.629992  |
| C | -4.669317 | 2.405511  | 5.872007  |
| N | -5.627894 | 3.317565  | 5.507790  |
| C | -4.958695 | 4.441208  | 5.073875  |
| N | -4.846577 | 1.155842  | 6.329198  |
| C | -3.685126 | 0.546686  | 6.520539  |
| N | -2.449882 | 1.044296  | 6.331234  |
| C | -2.286268 | 2.304367  | 5.884498  |
| N | -1.054763 | 2.793819  | 5.706491  |
| H | -3.714954 | -0.488950 | 6.853511  |
| H | -0.952440 | 3.571141  | 5.068810  |
| H | -0.258857 | 2.164581  | 5.805761  |
| H | -6.625794 | 3.180775  | 5.567622  |
| H | -5.489409 | 5.318300  | 4.730095  |
| N | 0.000000  | 0.000000  | 0.000000  |
| C | 0.629992  | 1.189854  | 0.087058  |
| C | 2.042241  | 1.163955  | 0.140145  |
| C | 2.638455  | -0.092440 | 0.125693  |
| N | 2.025694  | -1.284225 | 0.063937  |
| C | 0.706894  | -1.142156 | -0.000000 |
| N | 3.985301  | 0.164240  | 0.197823  |
| C | 4.124683  | 1.534783  | 0.239018  |
| N | 2.984930  | 2.169555  | 0.212211  |
| N | -0.078426 | 2.320400  | 0.103826  |
| H | 0.107120  | -2.049036 | -0.043267 |

|   |           |           |           |
|---|-----------|-----------|-----------|
| H | 0.392883  | 3.172853  | 0.365364  |
| H | -1.097657 | 2.286141  | 0.130311  |
| H | 4.719461  | -0.527858 | 0.178350  |
| H | 5.098369  | 2.002885  | 0.290186  |
| N | -2.757269 | -0.231804 | -0.004621 |
| C | -3.518837 | 0.913581  | -0.144343 |
| C | -4.973463 | 0.729396  | -0.133568 |
| C | -5.443094 | -0.521836 | 0.037100  |
| N | -4.608166 | -1.600707 | 0.219244  |
| C | -3.225725 | -1.501573 | 0.207428  |
| O | -2.985284 | 2.011446  | -0.274540 |
| O | -2.506289 | -2.475342 | 0.369870  |
| C | -5.835392 | 1.944003  | -0.282397 |
| H | -1.704852 | -0.126071 | -0.000000 |
| H | -6.505245 | -0.745032 | 0.061805  |
| H | -6.894886 | 1.678197  | -0.248380 |
| H | -5.622860 | 2.659608  | 0.518605  |
| H | -5.626206 | 2.456209  | -1.225684 |
| H | -4.973987 | -2.532345 | 0.354186  |
| C | 1.070362  | -0.464655 | 3.223054  |
| C | 0.473311  | -1.772493 | 3.182430  |
| C | -0.875638 | -1.934044 | 3.192107  |
| C | -1.762707 | -0.803566 | 3.189483  |
| C | -1.214181 | 0.497447  | 3.097252  |
| C | 0.232119  | 0.673357  | 3.192233  |
| N | 0.721921  | 1.931425  | 3.262955  |
| C | 2.023867  | 2.071255  | 3.377856  |
| C | 2.964557  | 1.015226  | 3.403862  |
| C | 2.479717  | -0.279529 | 3.304735  |
| C | -3.175958 | -0.951536 | 3.268125  |
| C | -3.957244 | 0.191624  | 3.153800  |
| C | -3.290707 | 1.421991  | 2.941486  |
| N | -1.985630 | 1.593178  | 2.932339  |
| C | -3.773044 | -2.316669 | 3.482748  |
| C | 3.391960  | -1.477958 | 3.264633  |
| H | 2.392209  | 3.095425  | 3.440525  |
| C | 4.426840  | 1.355172  | 3.543051  |
| H | -3.888504 | 2.322753  | 2.783840  |
| C | -5.460220 | 0.183483  | 3.265166  |
| H | -1.298800 | -2.932865 | 3.182830  |
| H | 1.115868  | -2.646815 | 3.154083  |
| H | 4.440221  | -1.192144 | 3.364373  |
| H | 3.158168  | -2.174978 | 4.077050  |
| H | 3.261158  | -2.016657 | 2.318032  |
| H | -3.502205 | -2.985840 | 2.657666  |
| H | -3.386169 | -2.745858 | 4.412610  |
| H | -4.860342 | -2.272401 | 3.554740  |
| H | -5.864379 | 1.155841  | 2.964741  |
| H | -5.914608 | -0.578789 | 2.626124  |
| H | -5.772047 | -0.006451 | 4.297766  |
| H | 4.576659  | 2.430678  | 3.419437  |
| H | 4.814600  | 1.078414  | 4.530324  |
| H | 5.041297  | 0.844780  | 2.796000  |
